# Supplementary material
Source: Elsevier journal article supplement (https://comptes-rendus.academie-sciences.fr/chimie/article/10.1016/j.crci.2010.04.021/file/attach/mmc1.pdf)
Supplement: mmc1 [file mmc1.pdf]

## Supplementary Material

**Thiophene-Fused Phospholo[3,2-*b*]phospholes and Their Dichalcogenides:  
Synthesis and Structure–Photophysical Properties Relationships**

Aiko Fukazawa, Taka-aki Murai, Liangchung Li, Youming Chen, and Shigehiro Yamaguchi\*

*Department of Chemistry, Graduate School of Science, Nagoya University,  
Nagoya 464-8602, Japan*

e-mail: yamaguchi.shigehiro@b.mbox.nagoya-u.ac.jp

---

**Table of Contents**

|                                                                                                                                                                 |           |
|-----------------------------------------------------------------------------------------------------------------------------------------------------------------|-----------|
| 1. $^1\text{H}$ , $^{13}\text{C}\{^1\text{H}\}$ , and $^{31}\text{P}\{^1\text{H}\}$ NMR Spectra of <b>3</b> , <b>4</b> , <b>2</b> , and <i>trans</i> - <b>8</b> | ----- S2  |
| 2. UV/Vis Absorption and Fluorescence Spectra of <i>cis</i> - <b>3</b> and <i>cis</i> - <b>4</b>                                                                | ----- S19 |
| 3. Crystallographic Data                                                                                                                                        | ----- S20 |
| 4. Theoretical Calculations                                                                                                                                     | ----- S26 |

# 1. $^1\text{H}$ , $^{13}\text{C}\{^1\text{H}\}$ , and $^{31}\text{P}\{^1\text{H}\}$ NMR Spectra

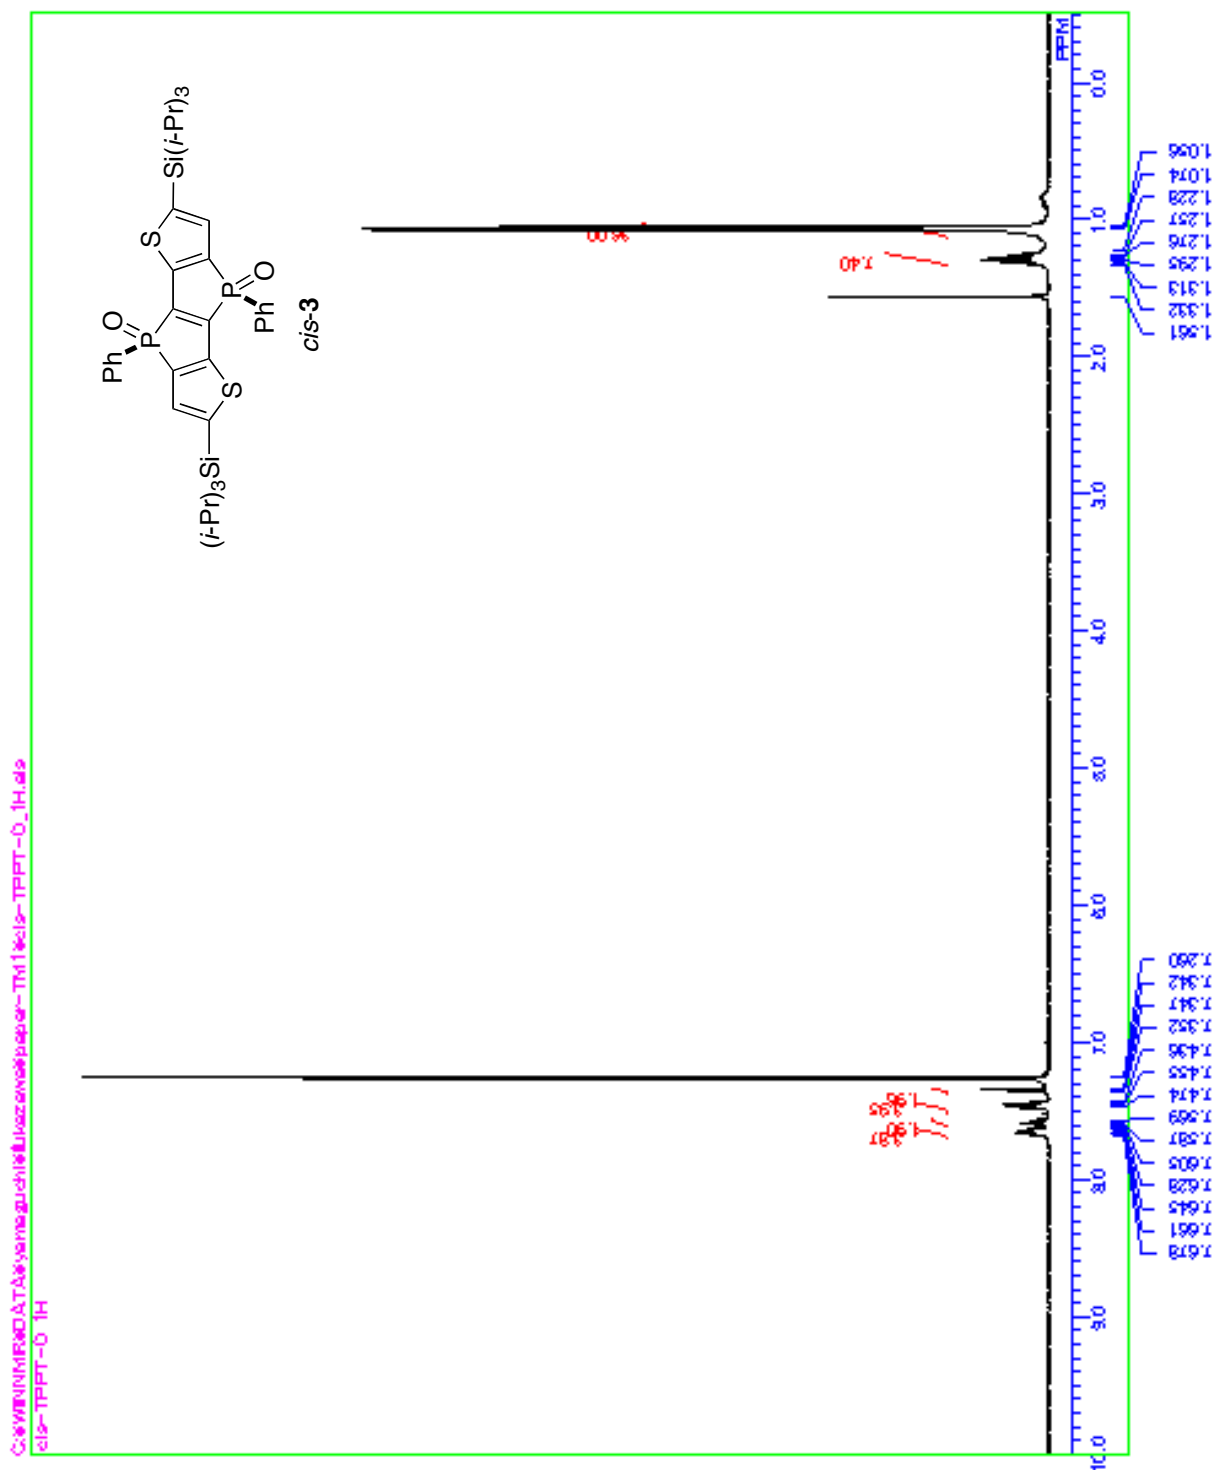



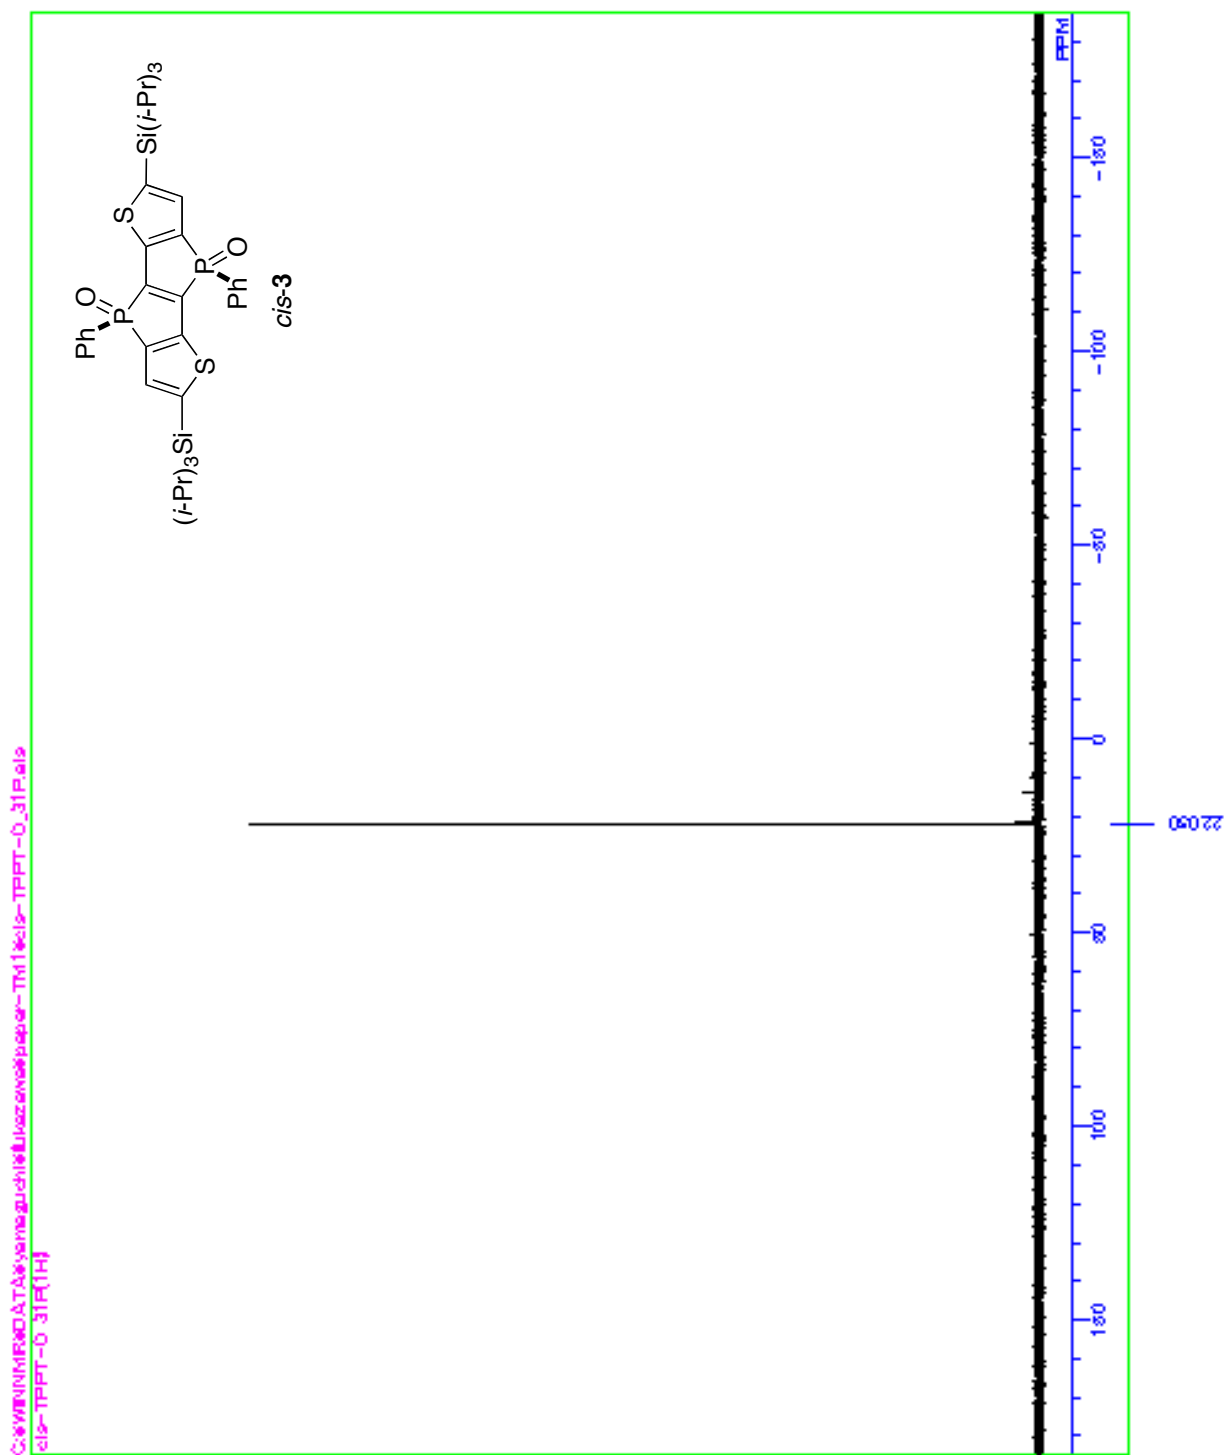

**Figure S3.**  $^{31}\text{P}\{^1\text{H}\}$  NMR Spectrum of *cis-3* ( $\text{CDCl}_3$ , 162 MHz).

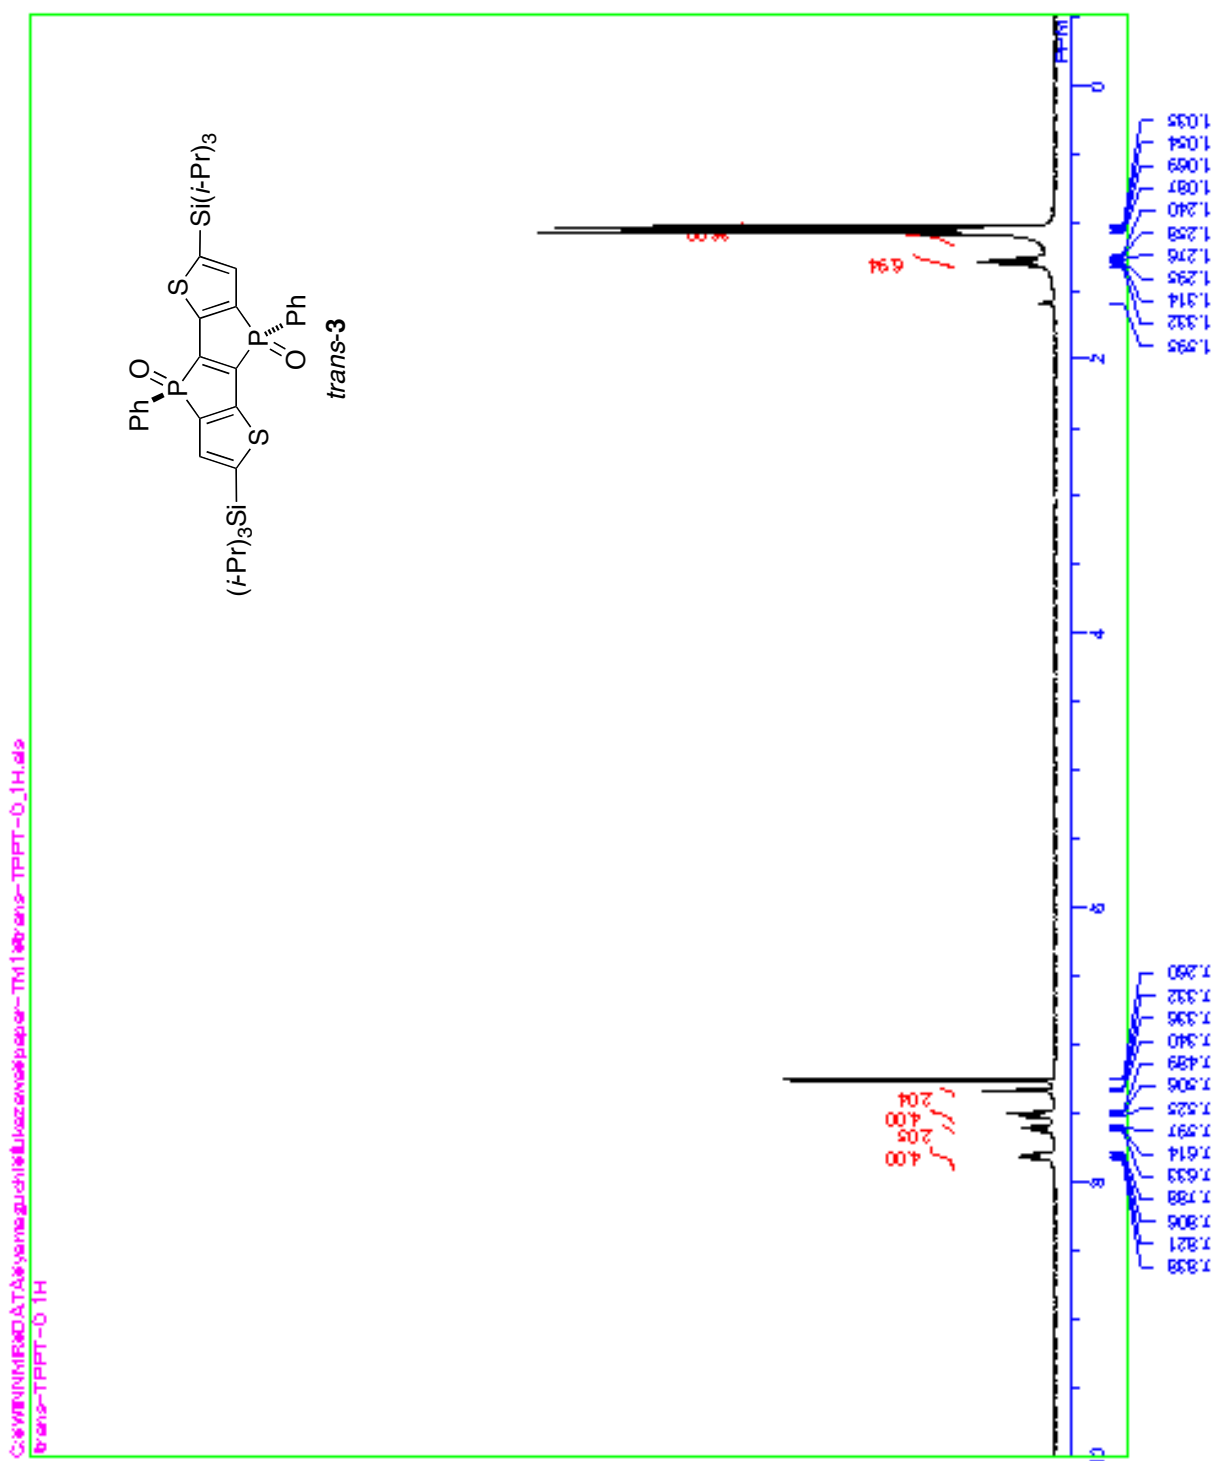

**Figure S4.** <sup>1</sup>H NMR Spectrum of *trans-3* (CDCl<sub>3</sub>, 400 MHz).

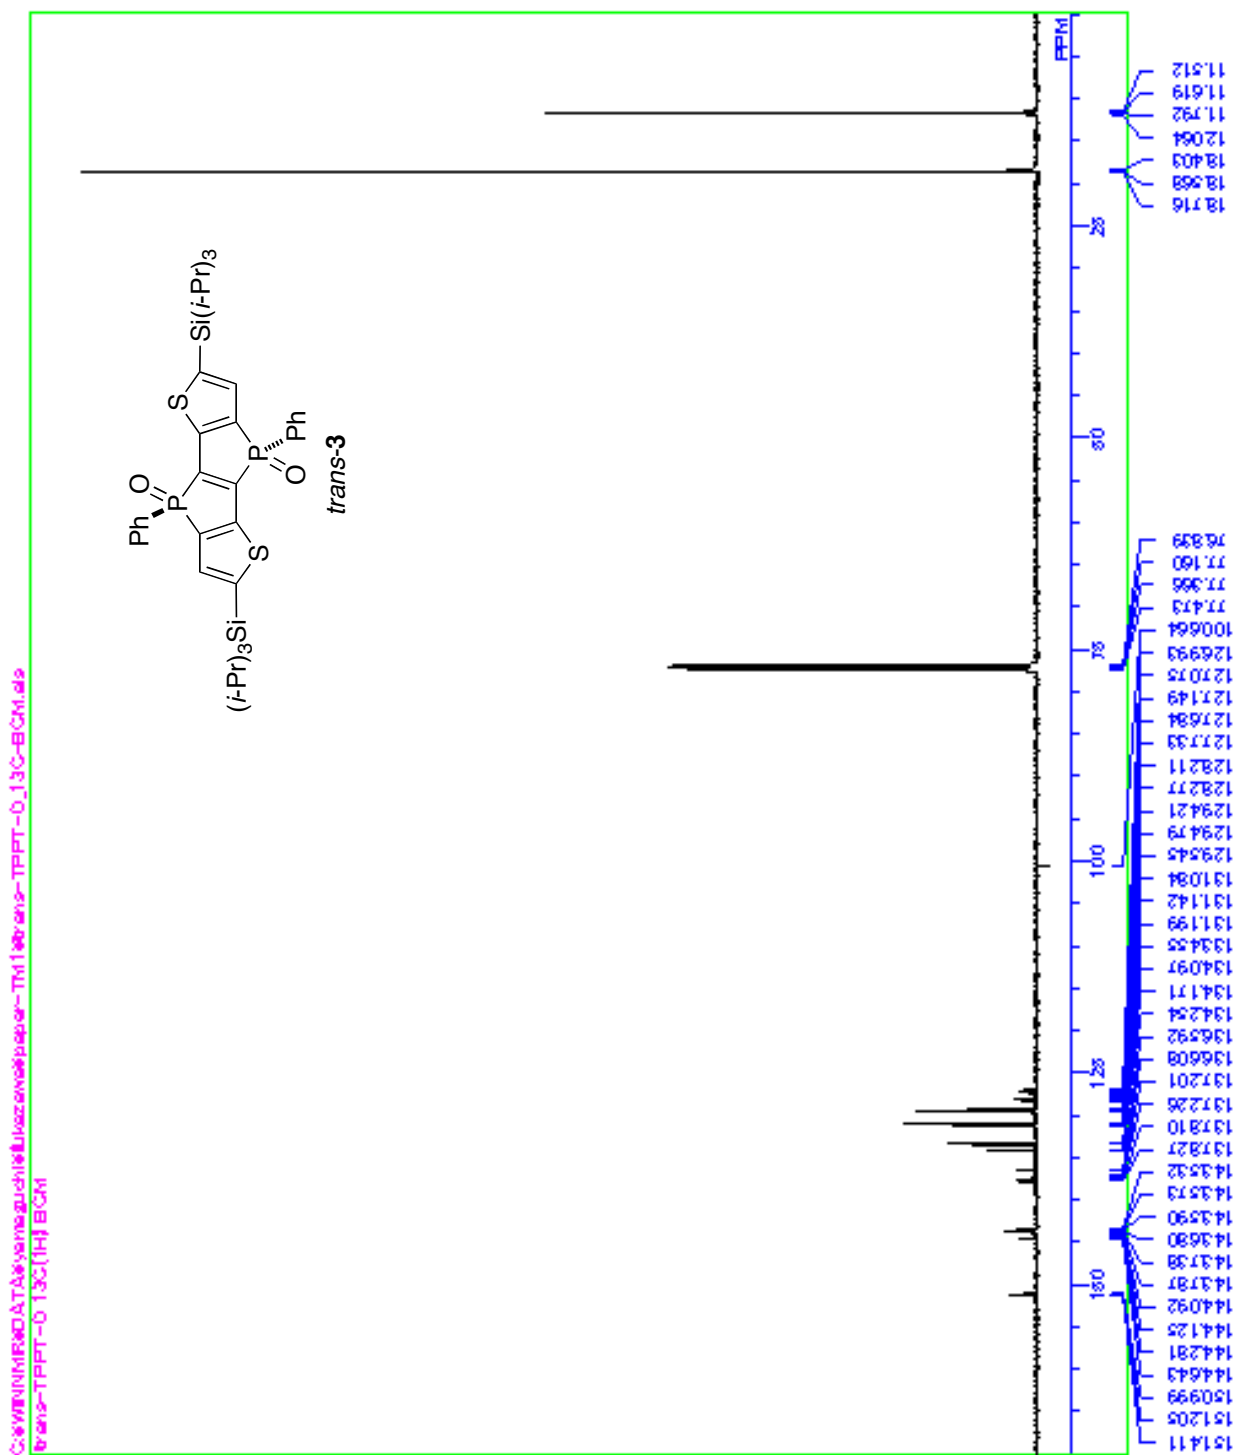

**Figure S5.**  $^{13}\text{C}\{^1\text{H}\}$  NMR Spectrum of *trans-3* (CDCl<sub>3</sub>, 100 MHz).

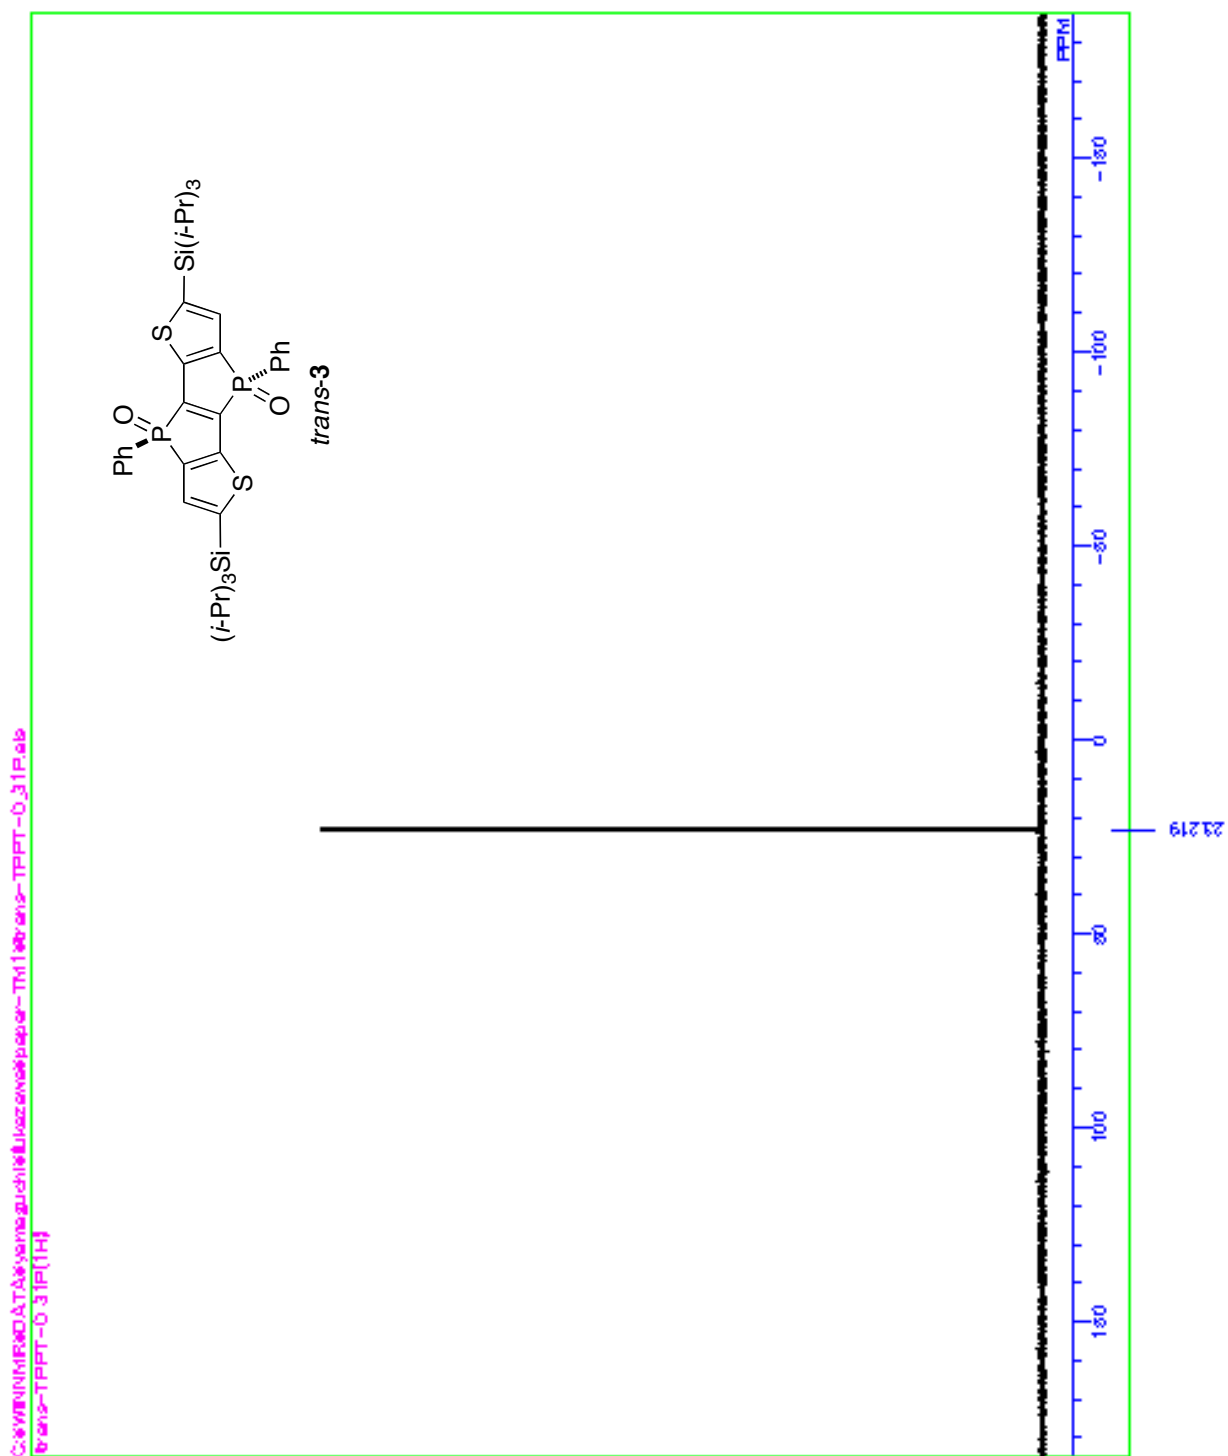

**Figure S6.**  $^{31}\text{P}\{^1\text{H}\}$  NMR Spectrum of *trans-3* ( $\text{CDCl}_3$ , 162 MHz).

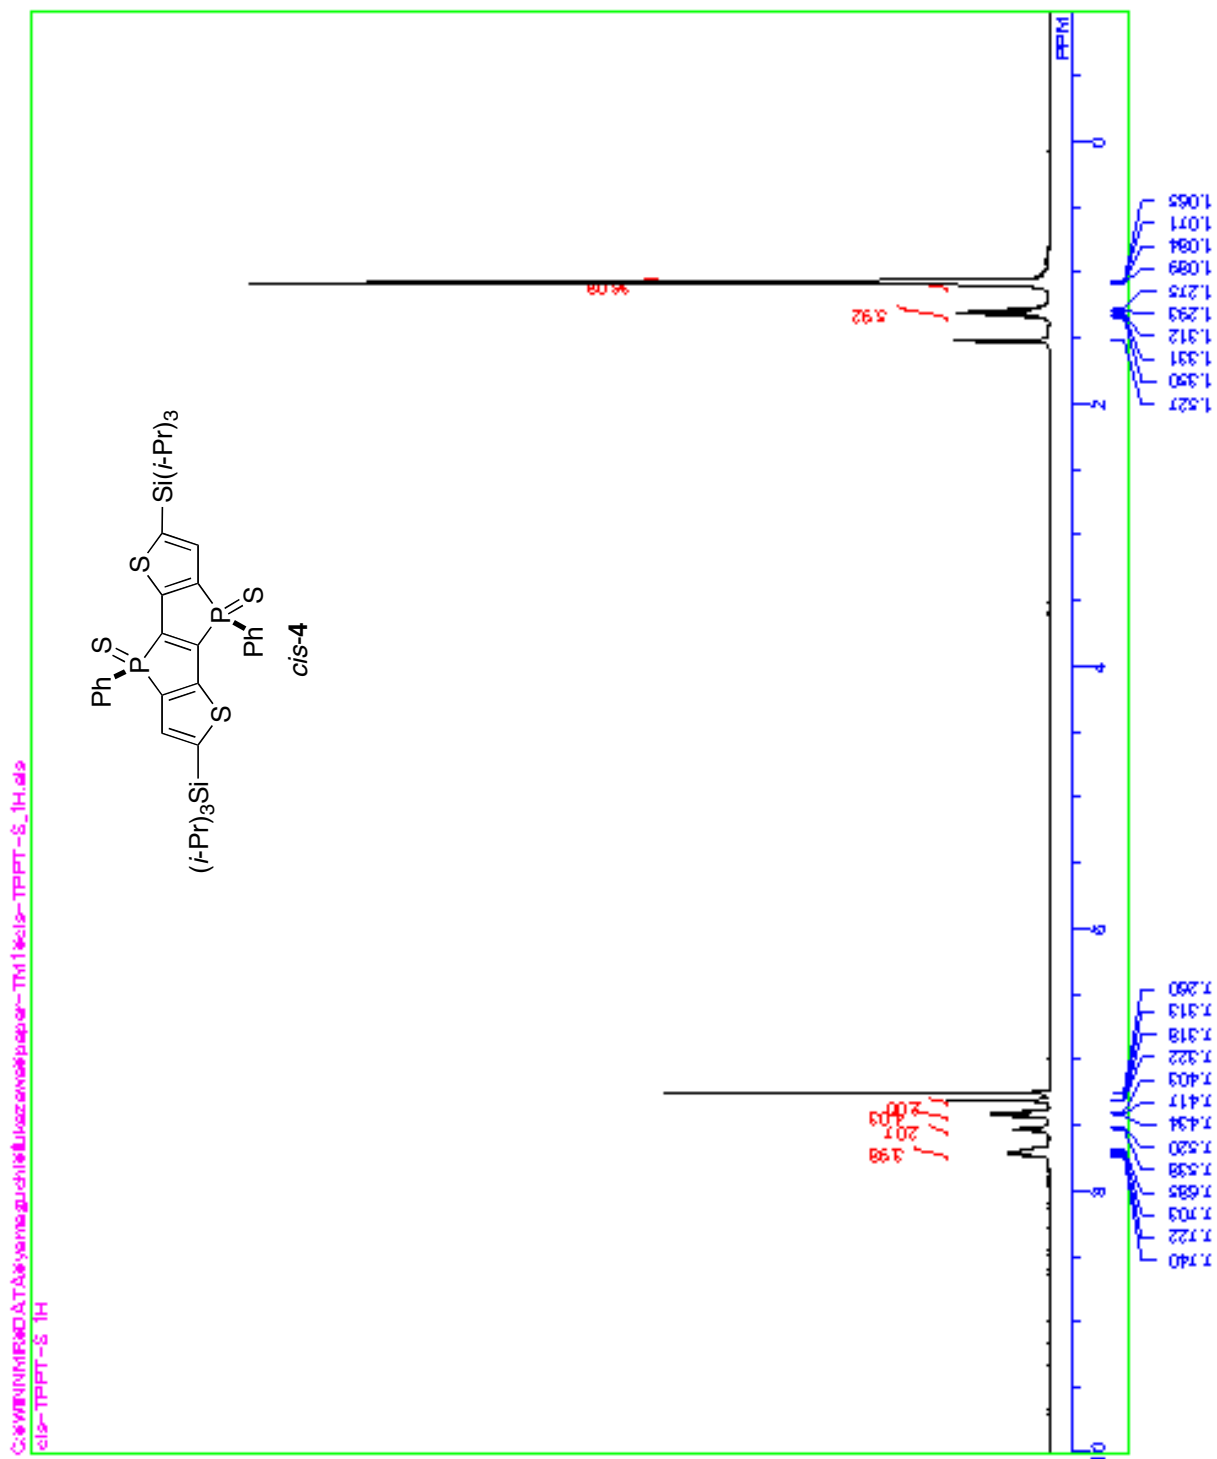

**Figure S7.**  $^1\text{H}$  NMR Spectrum of *cis*-4 ( $\text{CDCl}_3$ , 400 MHz).



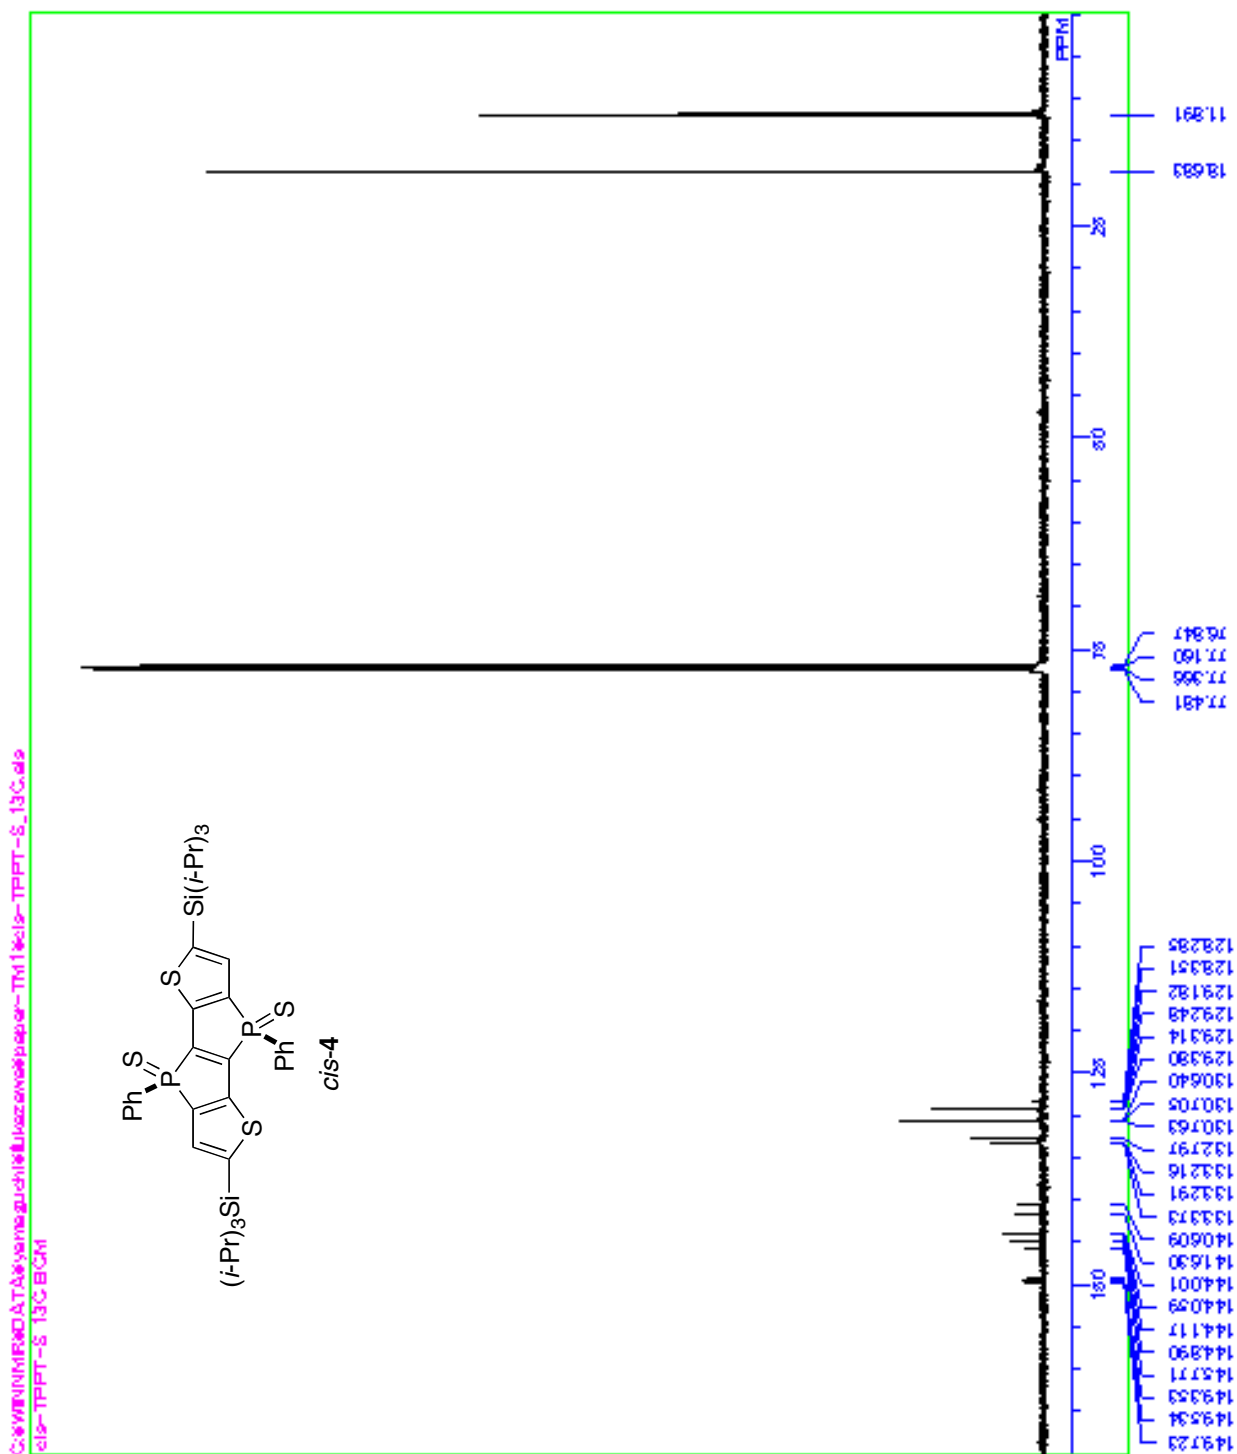

**Figure S8.**  $^{13}\text{C}\{^1\text{H}\}$  NMR Spectrum of *cis-4* ( $\text{CDCl}_3$ , 100 MHz).

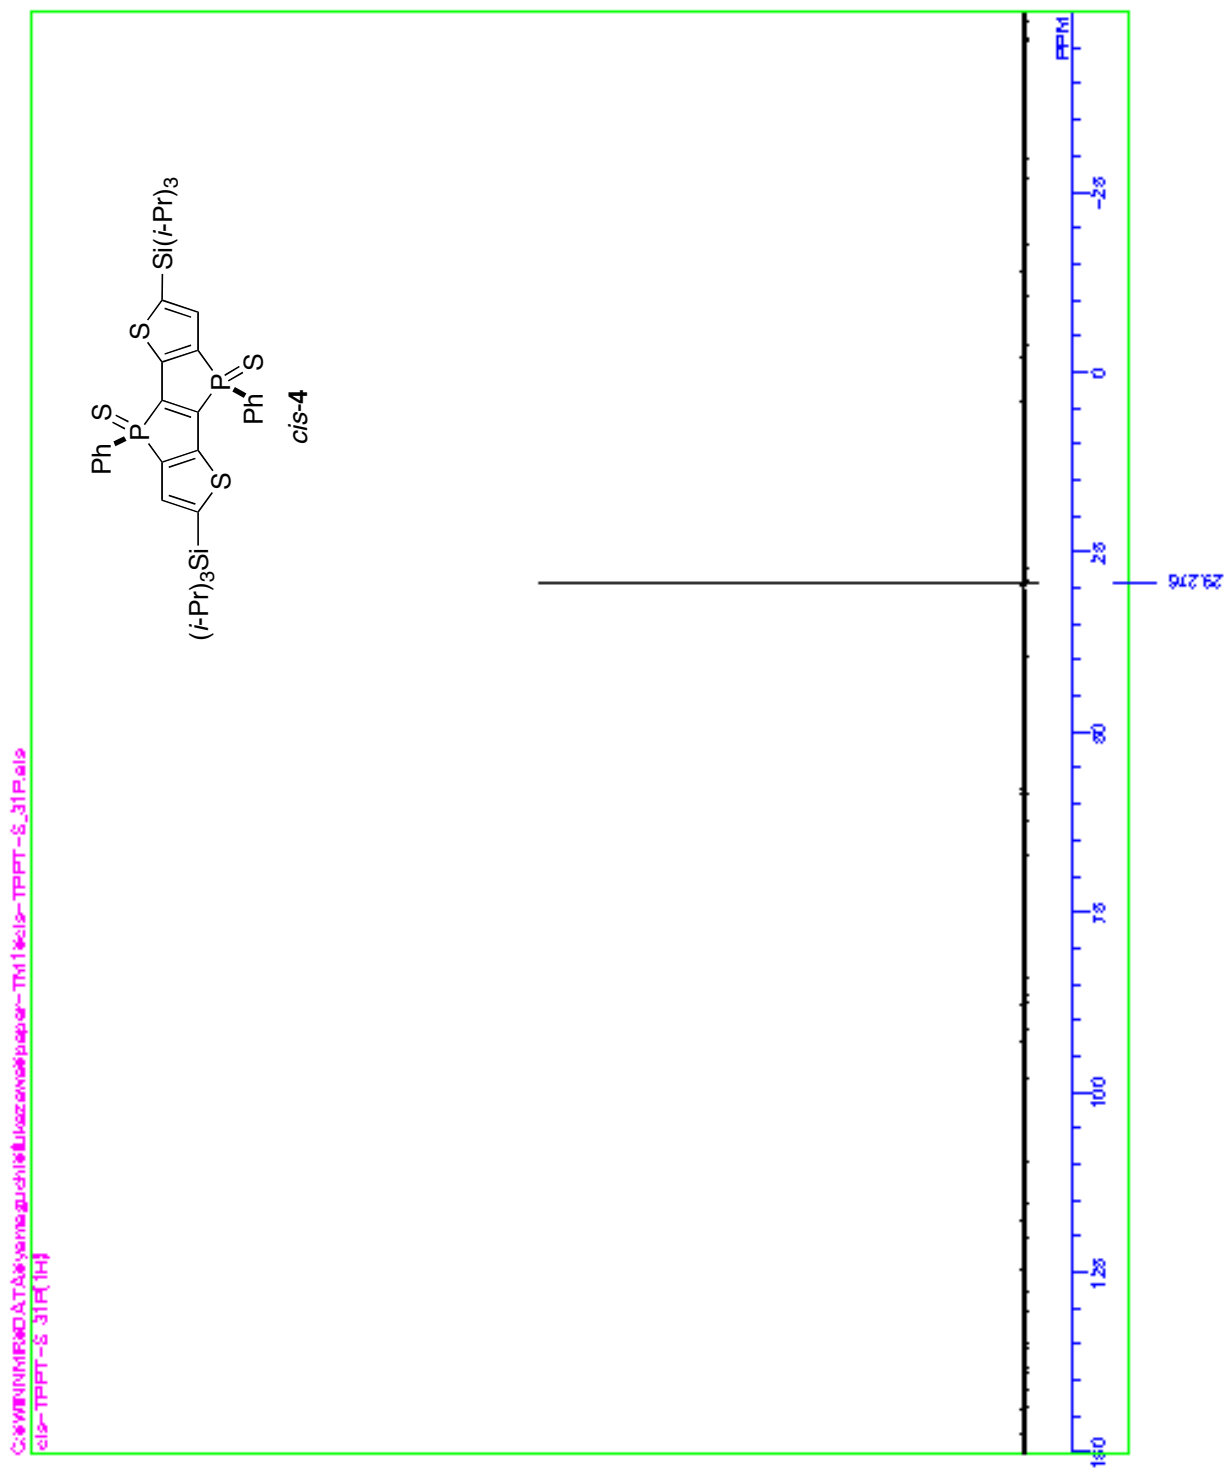

**Figure S9.**  $^{31}\text{P}\{^1\text{H}\}$  NMR Spectrum of *cis-4* ( $\text{CDCl}_3$ , 162 MHz).

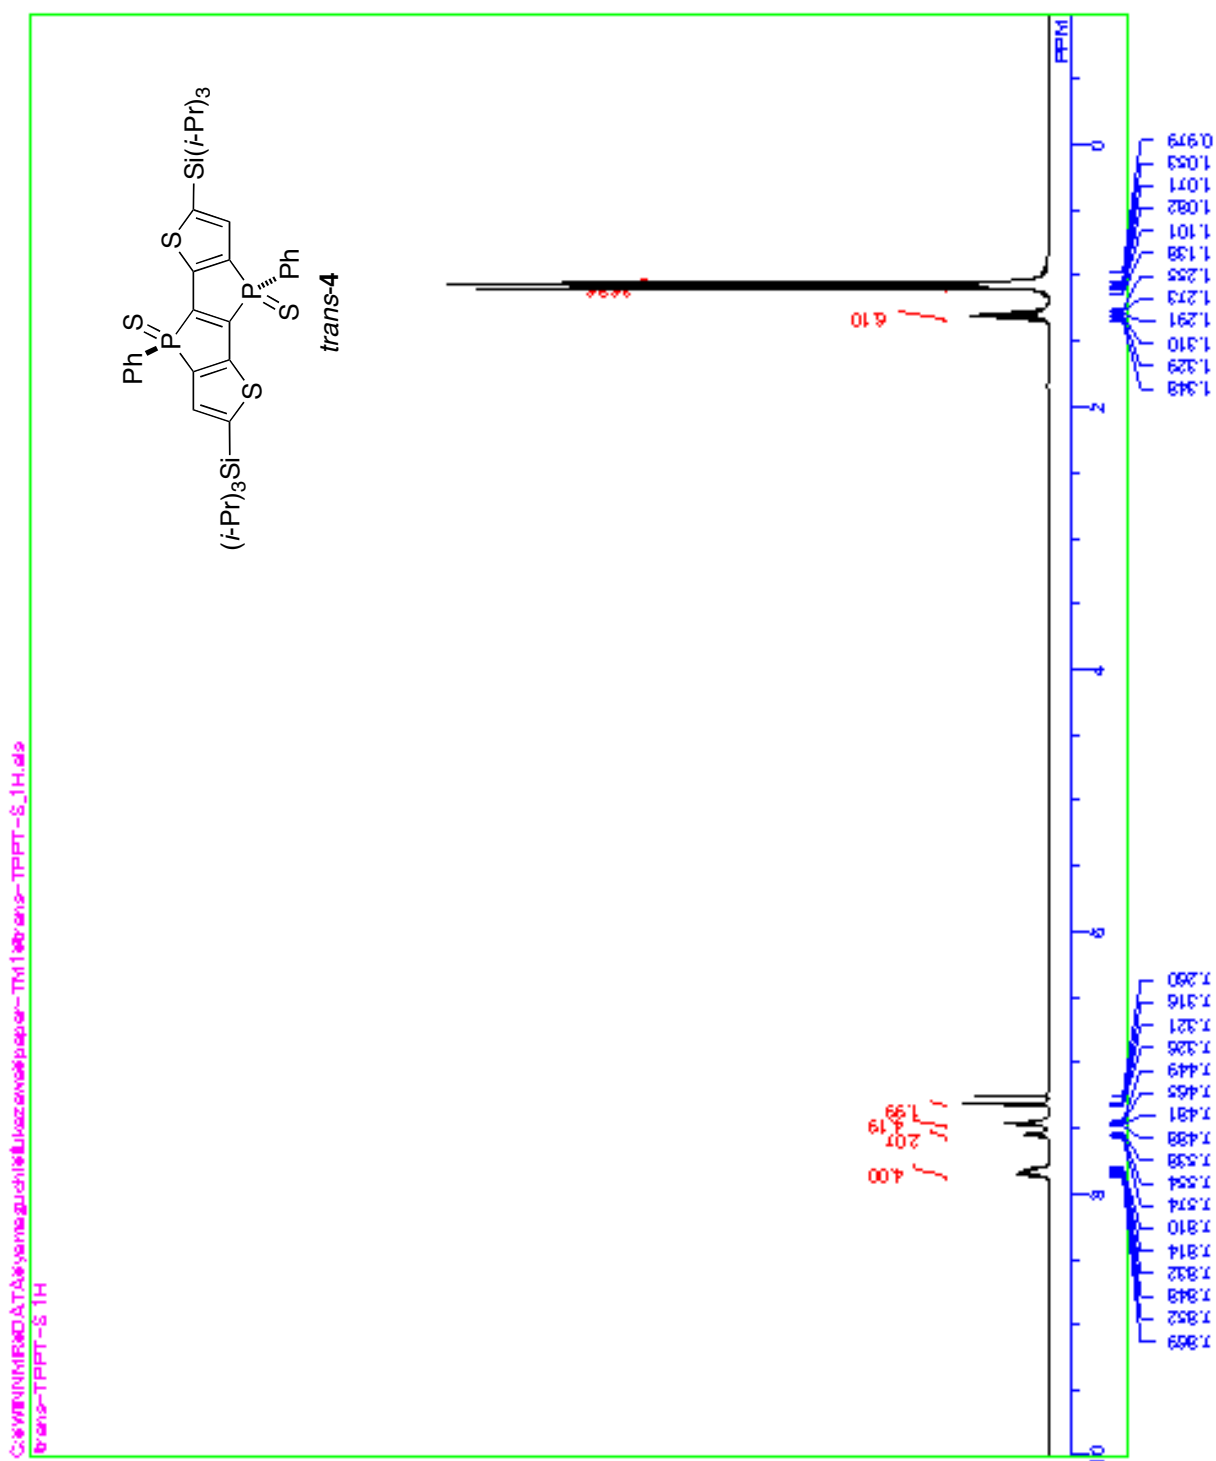

Figure S10.  $^1\text{H}$  NMR Spectrum of *trans-4* ( $\text{CDCl}_3$ , 400 MHz).

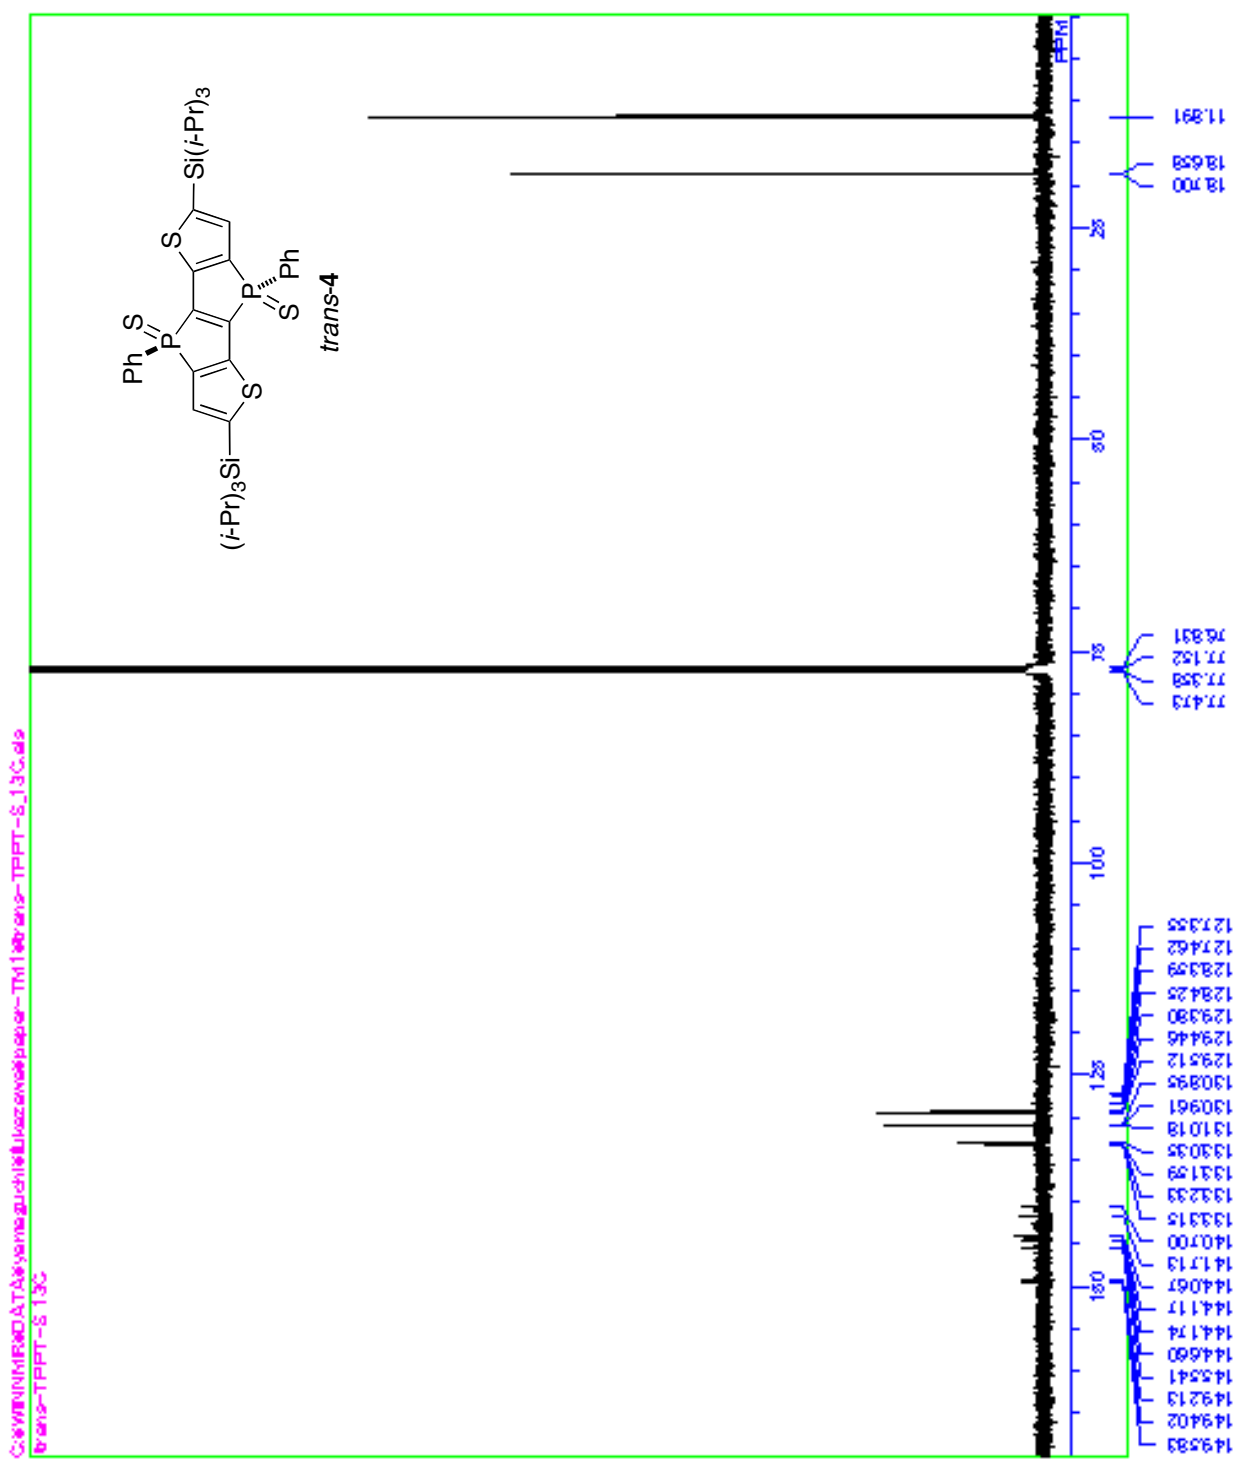

Figure S11.  $^{13}\text{C}\{^1\text{H}\}$  NMR Spectrum of *trans*-4 (CDCl<sub>3</sub>, 100 MHz).

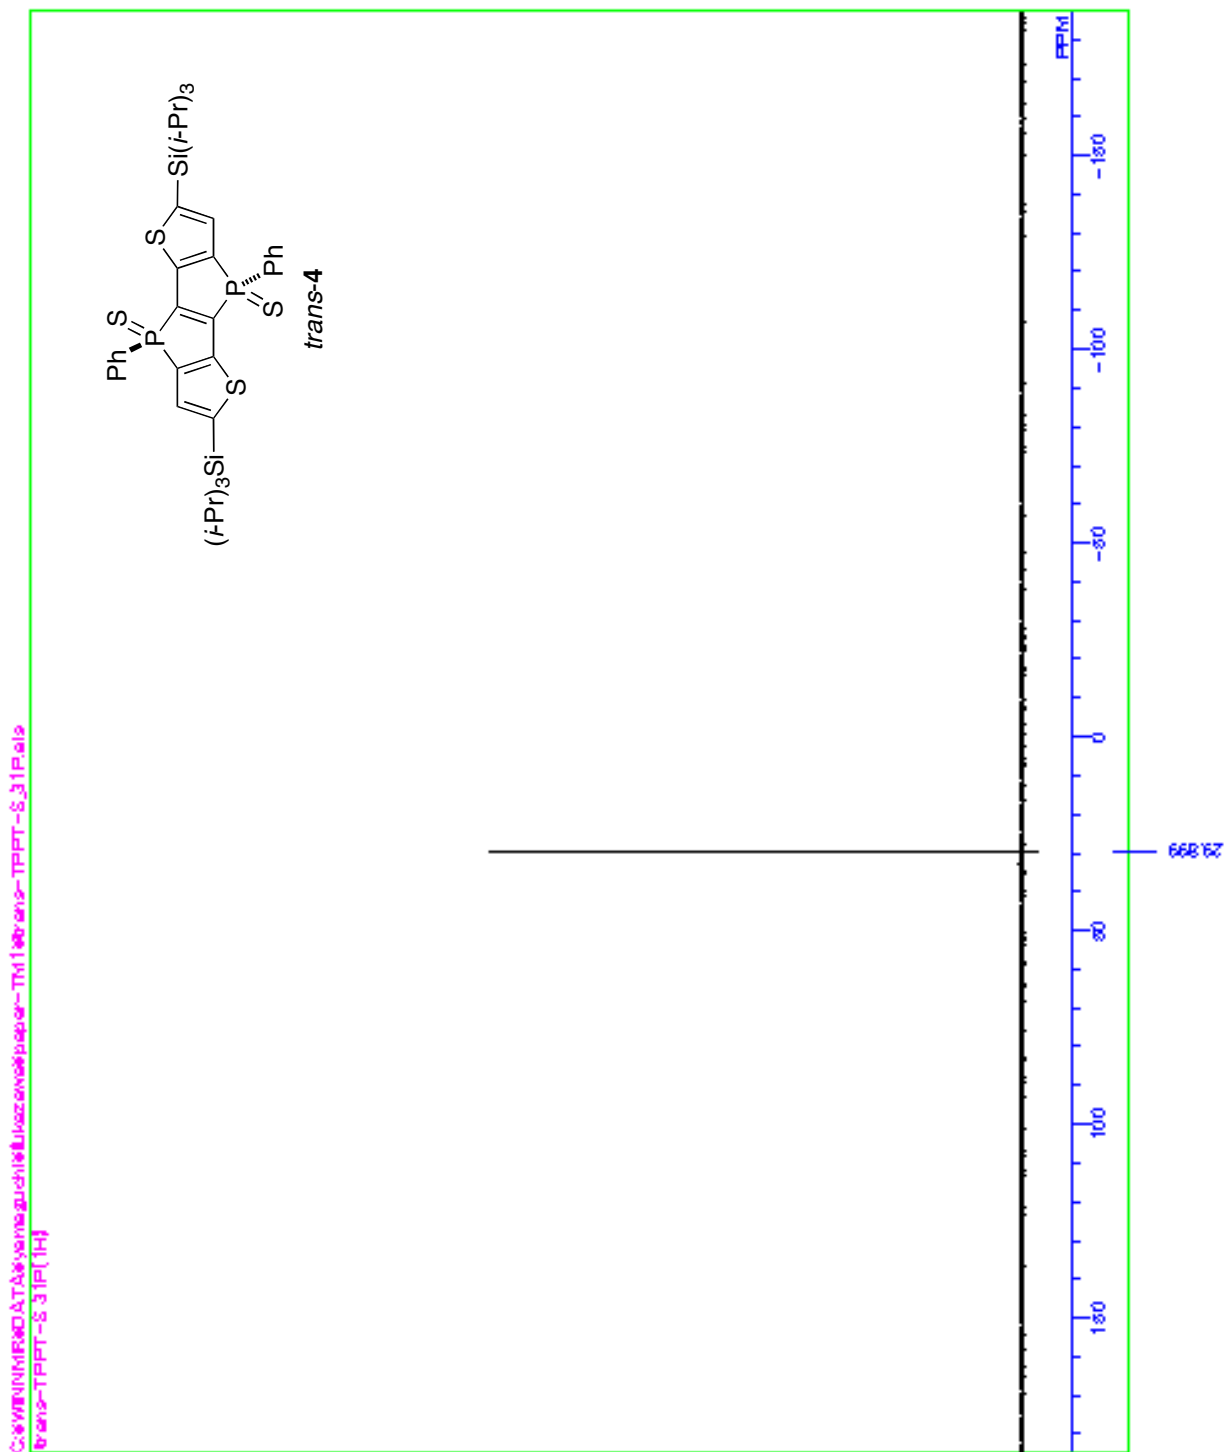

**Figure S12.**  $^{31}\text{P}\{^1\text{H}\}$  NMR Spectrum of *trans*-4 ( $\text{CDCl}_3$ , 162 MHz).









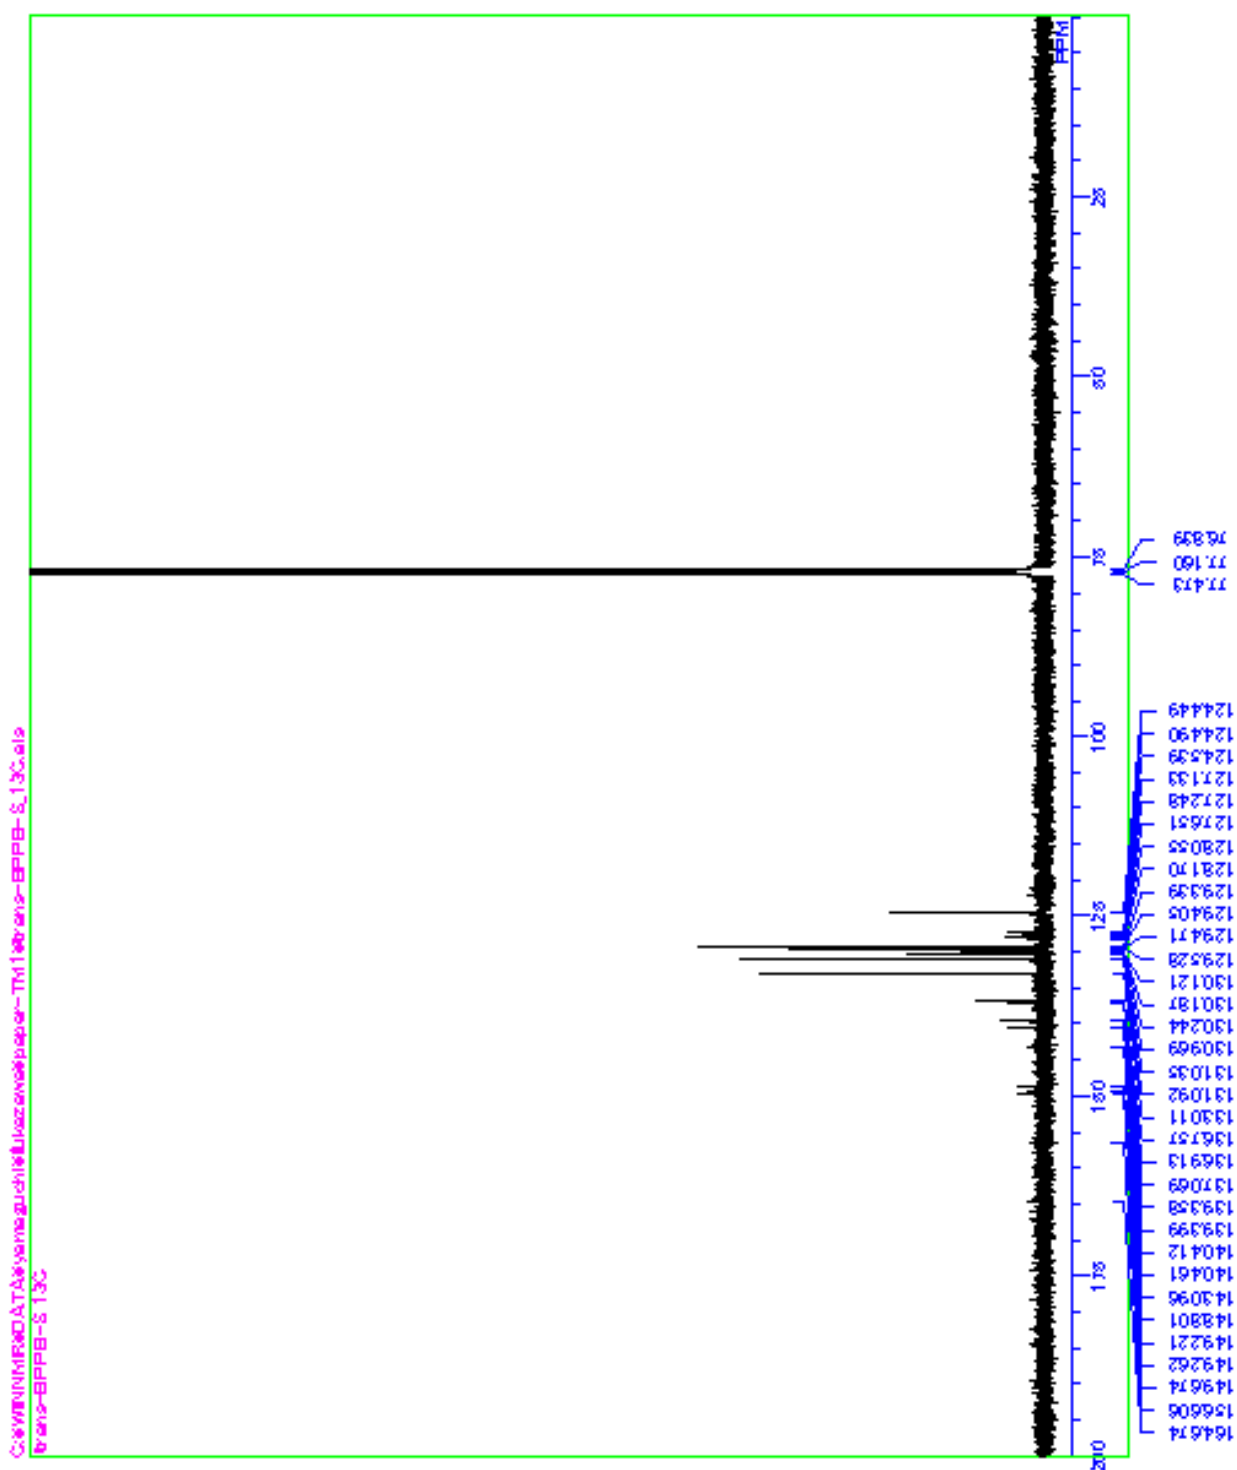

**Figure S16.**  $^{13}\text{C}\{^1\text{H}\}$  NMR Spectrum of *trans*-**8** ( $\text{CDCl}_3$ , 100 MHz).

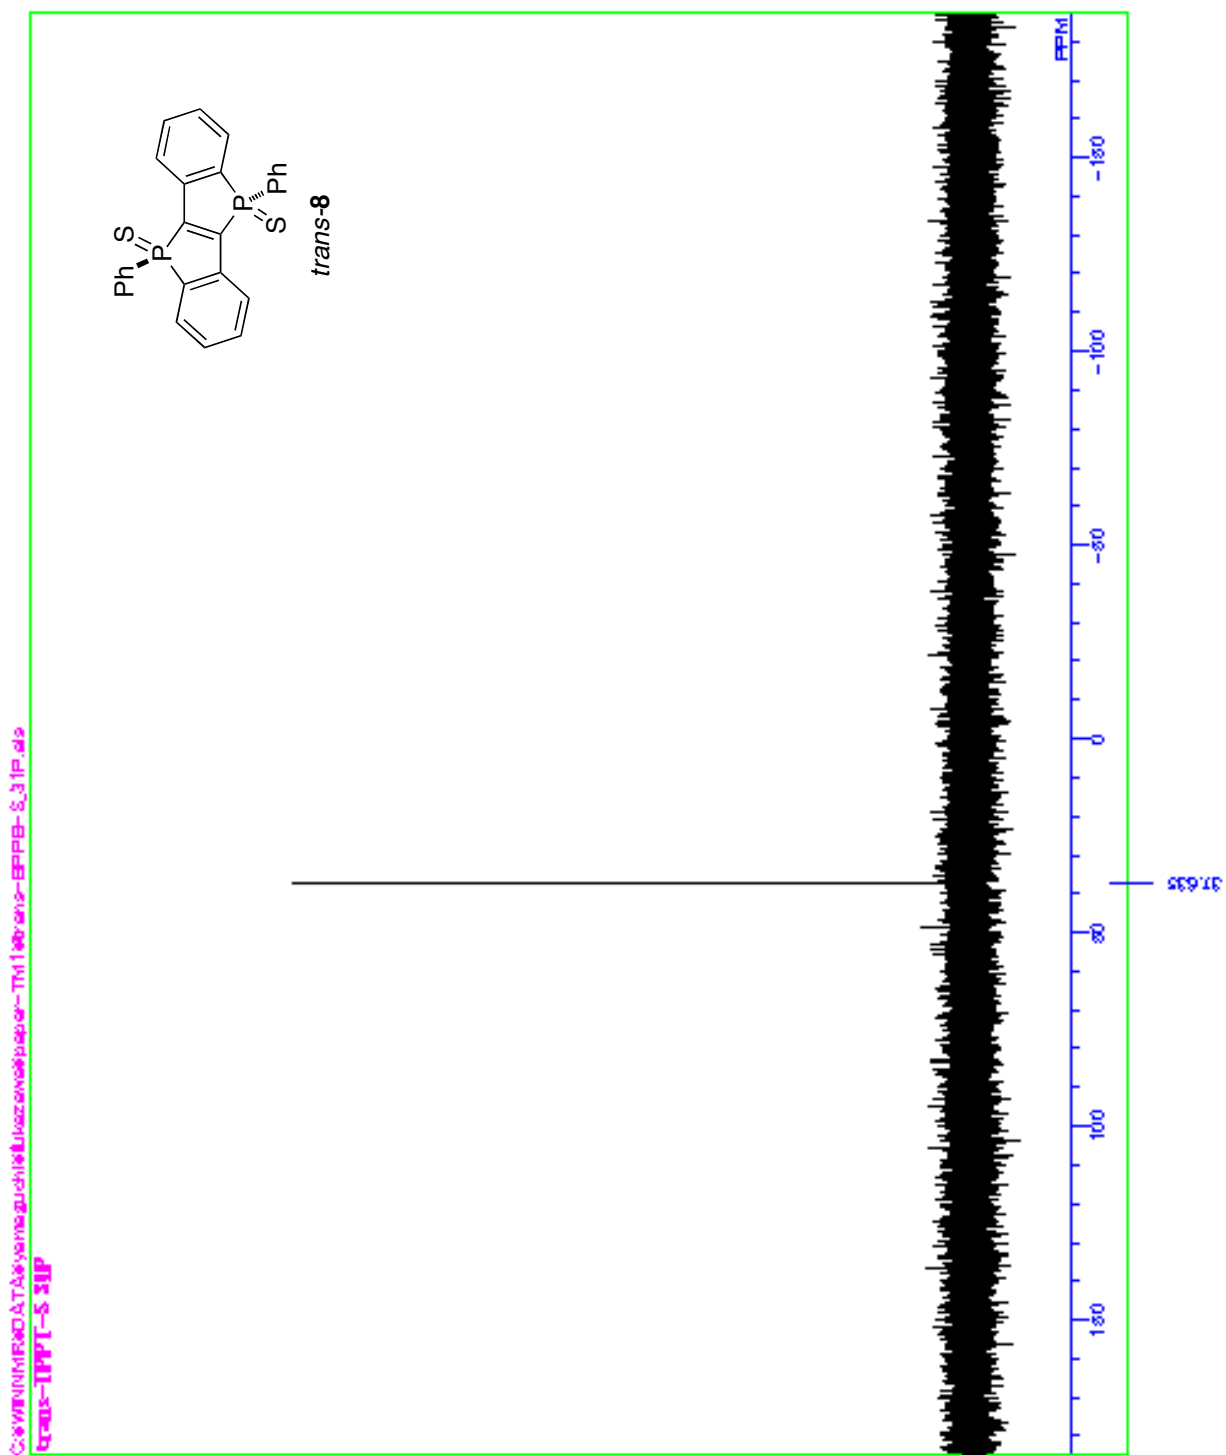

**Figure S17.**  $^{31}\text{P}\{^1\text{H}\}$  NMR Spectrum of *trans*-8 ( $\text{CDCl}_3$ , 162 MHz).

## 2. UV/Vis Absorption and Fluorescence Spectra of *cis-3*, *cis-4*, and *trans-8*

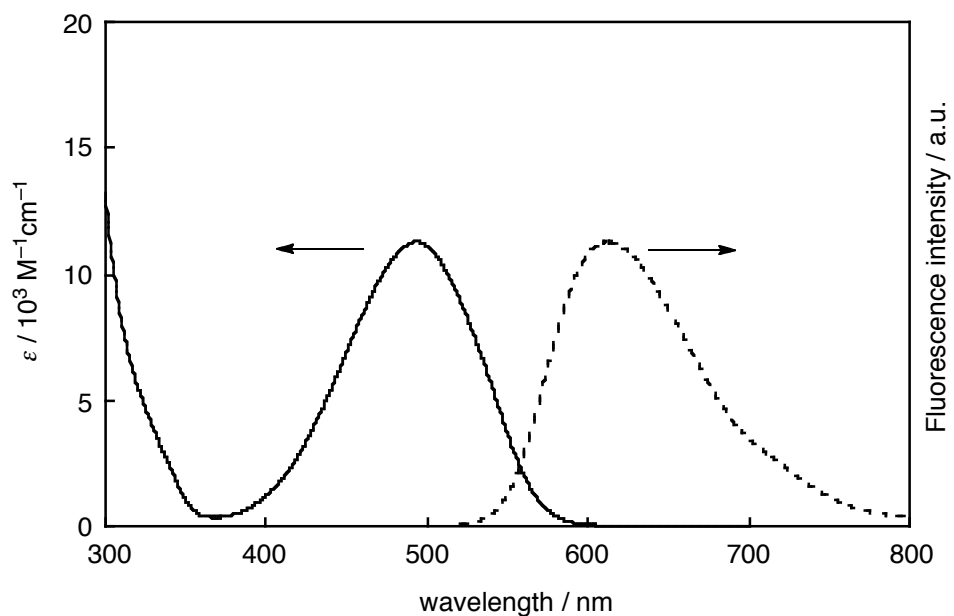

**Figure S18.** UV/Vis absorption (solid line) and fluorescence spectra (broken line) of *cis-3* in  $\text{CH}_2\text{Cl}_2$ .

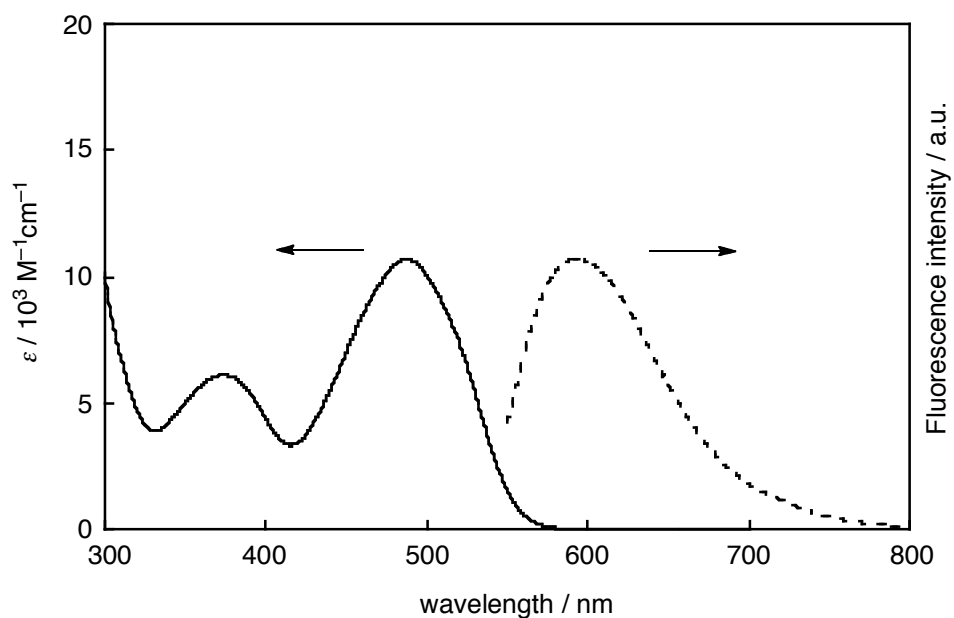

**Figure S19.** UV/Vis absorption (solid line) and fluorescence spectra (broken line) of *cis-4* in  $\text{CH}_2\text{Cl}_2$ .

### 3. Crystallographic Data

**Table S1.** Bond Lengths [Å] and Angles [°] for *cis-3*

|                 |            |                   |            |
|-----------------|------------|-------------------|------------|
| P(1)-O(1)       | 1.482(3)   | C(9)-C(10)        | 1.375(6)   |
| P(1)-C(1)       | 1.794(4)   | C(11)-C(16)       | 1.379(6)   |
| P(1)-C(11)      | 1.796(4)   | C(11)-C(12)       | 1.381(6)   |
| P(1)-C(4)       | 1.826(4)   | C(12)-C(13)       | 1.383(7)   |
| P(2)-O(2)       | 1.484(3)   | C(13)-C(14)       | 1.373(7)   |
| P(2)-C(17)      | 1.790(5)   | C(14)-C(15)       | 1.368(7)   |
| P(2)-C(5)       | 1.799(4)   | C(15)-C(16)       | 1.392(7)   |
| P(2)-C(3)       | 1.812(4)   | C(17)-C(22)       | 1.401(6)   |
| S(1)-C(2)       | 1.714(4)   | C(17)-C(18)       | 1.407(6)   |
| S(1)-C(7)       | 1.738(4)   | C(18)-C(19)       | 1.386(6)   |
| S(2)-C(6)       | 1.719(4)   | C(19)-C(20)       | 1.389(7)   |
| S(2)-C(10)      | 1.744(4)   | C(20)-C(21)       | 1.379(7)   |
| Si(1)-C(23)     | 1.884(5)   | C(21)-C(22)       | 1.389(6)   |
| Si(1)-C(7)      | 1.885(4)   | C(23)-C(24)       | 1.530(7)   |
| Si(1)-C(29)     | 1.896(5)   | C(23)-C(25)       | 1.543(7)   |
| Si(1)-C(26)     | 1.897(4)   | C(26)-C(27)       | 1.531(6)   |
| Si(2)-C(38)     | 1.878(5)   | C(26)-C(28)       | 1.543(6)   |
| Si(2)-C(35)     | 1.881(5)   | C(29)-C(30)       | 1.522(6)   |
| Si(2)-C(10)     | 1.885(5)   | C(29)-C(31)       | 1.547(7)   |
| Si(2)-C(32)     | 1.888(5)   | C(32)-C(34)       | 1.535(7)   |
| C(1)-C(2)       | 1.381(6)   | C(32)-C(33)       | 1.537(7)   |
| C(1)-C(8)       | 1.397(6)   | C(35)-C(36)       | 1.540(7)   |
| C(2)-C(3)       | 1.456(6)   | C(35)-C(37)       | 1.553(6)   |
| C(3)-C(4)       | 1.352(6)   | C(38)-C(40)       | 1.533(7)   |
| C(4)-C(6)       | 1.462(6)   | C(38)-C(39)       | 1.533(7)   |
| C(5)-C(6)       | 1.373(6)   | C(41)-Cl(1)       | 1.751(5)   |
| C(5)-C(9)       | 1.403(6)   | C(41)-Cl(3)       | 1.752(5)   |
| C(7)-C(8)       | 1.376(6)   | C(41)-Cl(2)       | 1.758(5)   |
| O(1)-P(1)-C(1)  | 118.08(19) | O(2)-P(2)-C(3)    | 115.92(19) |
| O(1)-P(1)-C(11) | 114.62(19) | C(17)-P(2)-C(3)   | 107.0(2)   |
| C(1)-P(1)-C(11) | 108.5(2)   | C(5)-P(2)-C(3)    | 92.0(2)    |
| O(1)-P(1)-C(4)  | 114.66(18) | C(2)-S(1)-C(7)    | 92.8(2)    |
| C(1)-P(1)-C(4)  | 90.51(19)  | C(6)-S(2)-C(10)   | 92.4(2)    |
| C(11)-P(1)-C(4) | 107.7(2)   | C(23)-Si(1)-C(7)  | 108.9(2)   |
| O(2)-P(2)-C(17) | 113.26(19) | C(23)-Si(1)-C(29) | 108.6(2)   |
| O(2)-P(2)-C(5)  | 118.85(19) | C(7)-Si(1)-C(29)  | 106.4(2)   |
| C(17)-P(2)-C(5) | 107.5(2)   | C(23)-Si(1)-C(26) | 111.3(2)   |

|                   |          |                   |          |
|-------------------|----------|-------------------|----------|
| C(7)-Si(1)-C(26)  | 110.1(2) | C(12)-C(11)-P(1)  | 118.9(3) |
| C(29)-Si(1)-C(26) | 111.4(2) | C(11)-C(12)-C(13) | 119.8(5) |
| C(38)-Si(2)-C(35) | 117.1(2) | C(14)-C(13)-C(12) | 121.2(5) |
| C(38)-Si(2)-C(10) | 107.1(2) | C(15)-C(14)-C(13) | 119.4(4) |
| C(35)-Si(2)-C(10) | 106.0(2) | C(14)-C(15)-C(16) | 119.6(5) |
| C(38)-Si(2)-C(32) | 109.0(2) | C(11)-C(16)-C(15) | 121.1(4) |
| C(35)-Si(2)-C(32) | 108.7(2) | C(22)-C(17)-C(18) | 119.5(4) |
| C(10)-Si(2)-C(32) | 108.7(2) | C(22)-C(17)-P(2)  | 119.9(4) |
| C(2)-C(1)-C(8)    | 112.4(4) | C(18)-C(17)-P(2)  | 120.3(3) |
| C(2)-C(1)-P(1)    | 109.8(3) | C(19)-C(18)-C(17) | 120.3(4) |
| C(8)-C(1)-P(1)    | 137.8(3) | C(18)-C(19)-C(20) | 119.8(5) |
| C(1)-C(2)-C(3)    | 115.4(4) | C(21)-C(20)-C(19) | 120.0(5) |
| C(1)-C(2)-S(1)    | 111.0(3) | C(20)-C(21)-C(22) | 121.4(5) |
| C(3)-C(2)-S(1)    | 133.6(3) | C(21)-C(22)-C(17) | 119.0(5) |
| C(4)-C(3)-C(2)    | 112.7(4) | C(24)-C(23)-C(25) | 109.8(4) |
| C(4)-C(3)-P(2)    | 110.5(3) | C(24)-C(23)-Si(1) | 111.5(3) |
| C(2)-C(3)-P(2)    | 136.4(3) | C(25)-C(23)-Si(1) | 114.4(3) |
| C(3)-C(4)-C(6)    | 112.9(4) | C(27)-C(26)-C(28) | 110.4(4) |
| C(3)-C(4)-P(1)    | 111.5(3) | C(27)-C(26)-Si(1) | 111.2(3) |
| C(6)-C(4)-P(1)    | 134.6(3) | C(28)-C(26)-Si(1) | 115.5(3) |
| C(6)-C(5)-C(9)    | 112.0(4) | C(30)-C(29)-C(31) | 109.9(4) |
| C(6)-C(5)-P(2)    | 108.2(3) | C(30)-C(29)-Si(1) | 113.8(3) |
| C(9)-C(5)-P(2)    | 139.7(3) | C(31)-C(29)-Si(1) | 112.4(3) |
| C(5)-C(6)-C(4)    | 116.3(4) | C(34)-C(32)-C(33) | 111.0(5) |
| C(5)-C(6)-S(2)    | 111.5(3) | C(34)-C(32)-Si(2) | 111.8(3) |
| C(4)-C(6)-S(2)    | 132.1(3) | C(33)-C(32)-Si(2) | 114.0(4) |
| C(8)-C(7)-S(1)    | 109.1(3) | C(36)-C(35)-C(37) | 109.4(4) |
| C(8)-C(7)-Si(1)   | 128.5(3) | C(36)-C(35)-Si(2) | 115.0(3) |
| S(1)-C(7)-Si(1)   | 122.4(2) | C(37)-C(35)-Si(2) | 113.5(3) |
| C(7)-C(8)-C(1)    | 114.8(4) | C(40)-C(38)-C(39) | 111.3(5) |
| C(10)-C(9)-C(5)   | 115.1(4) | C(40)-C(38)-Si(2) | 112.5(4) |
| C(9)-C(10)-S(2)   | 109.0(3) | C(39)-C(38)-Si(2) | 115.2(4) |
| C(9)-C(10)-Si(2)  | 129.5(3) | Cl(1)-C(41)-Cl(3) | 110.4(3) |
| S(2)-C(10)-Si(2)  | 121.3(3) | Cl(1)-C(41)-Cl(2) | 110.7(3) |
| C(16)-C(11)-C(12) | 118.7(4) | Cl(3)-C(41)-Cl(2) | 110.7(3) |
| C(16)-C(11)-P(1)  | 122.3(3) |                   |          |

**Table S2.** Bond Lengths [Å] and Angles [°] for *trans-3*

|                    |            |                   |           |
|--------------------|------------|-------------------|-----------|
| P(1)-O(1)          | 1.478(4)   | C(6)-C(11)        | 1.385(6)  |
| P(1)-C(6)          | 1.793(6)   | C(7)-C(8)         | 1.378(7)  |
| P(1)-C(1)          | 1.813(10)  | C(8)-C(9)         | 1.378(8)  |
| P(1)-C(5)#1        | 1.819(6)   | C(9)-C(10)        | 1.368(8)  |
| C(1)-C(4)          | 1.386(7)   | C(10)-C(11)       | 1.386(7)  |
| C(1)-C(2)          | 1.402(7)   | Si(1)-C(12)       | 1.878(6)  |
| C(2)-C(3)          | 1.380(8)   | Si(1)-C(14)       | 1.892(7)  |
| C(3)-S(1)          | 1.743(6)   | Si(1)-C(13)       | 1.897(7)  |
| C(3)-Si(1)         | 1.881(9)   | C(12)-C(15)       | 1.526(8)  |
| S(1)-C(4)          | 1.726(10)  | C(12)-C(16)       | 1.543(8)  |
| C(4)-C(5)          | 1.452(7)   | C(13)-C(17)       | 1.482(8)  |
| C(5)-C(5)#1        | 1.366(9)   | C(13)-C(18)       | 1.555(9)  |
| C(5)-P(1)#1        | 1.819(6)   | C(14)-C(19)       | 1.530(7)  |
| C(6)-C(7)          | 1.384(7)   | C(14)-C(20)       | 1.552(10) |
| O(1)-P(1)-C(6)     | 114.7(3)   | C(11)-C(6)-P(1)   | 120.1(4)  |
| O(1)-P(1)-C(1)     | 121.4(2)   | C(8)-C(7)-C(6)    | 119.6(5)  |
| C(6)-P(1)-C(1)     | 107.4(2)   | C(9)-C(8)-C(7)    | 120.5(5)  |
| O(1)-P(1)-C(5)#1   | 113.7(2)   | C(10)-C(9)-C(8)   | 120.4(5)  |
| C(6)-P(1)-C(5)#1   | 105.27(19) | C(9)-C(10)-C(11)  | 119.5(5)  |
| C(1)-P(1)-C(5)#1   | 91.20(19)  | C(6)-C(11)-C(10)  | 120.4(5)  |
| C(4)-C(1)-C(2)     | 112.1(4)   | C(12)-Si(1)-C(3)  | 108.2(2)  |
| C(4)-C(1)-P(1)     | 108.9(3)   | C(12)-Si(1)-C(14) | 109.9(3)  |
| C(2)-C(1)-P(1)     | 138.5(4)   | C(3)-Si(1)-C(14)  | 107.7(3)  |
| C(3)-C(2)-C(1)     | 115.0(5)   | C(12)-Si(1)-C(13) | 107.0(3)  |
| C(2)-C(3)-S(1)     | 109.1(4)   | C(3)-Si(1)-C(13)  | 106.1(3)  |
| C(2)-C(3)-Si(1)    | 127.0(4)   | C(14)-Si(1)-C(13) | 117.6(3)  |
| S(1)-C(3)-Si(1)    | 123.8(2)   | C(15)-C(12)-C(16) | 110.3(5)  |
| C(4)-S(1)-C(3)     | 92.6(2)    | C(15)-C(12)-Si(1) | 110.8(4)  |
| C(1)-C(4)-C(5)     | 115.8(4)   | C(16)-C(12)-Si(1) | 113.2(4)  |
| C(1)-C(4)-S(1)     | 111.0(3)   | C(17)-C(13)-C(18) | 112.1(5)  |
| C(5)-C(4)-S(1)     | 133.0(4)   | C(17)-C(13)-Si(1) | 117.2(4)  |
| C(5)#1-C(5)-C(4)   | 113.3(5)   | C(18)-C(13)-Si(1) | 111.0(5)  |
| C(5)#1-C(5)-P(1)#1 | 110.9(4)   | C(19)-C(14)-C(20) | 109.8(4)  |
| C(4)-C(5)-P(1)#1   | 135.8(3)   | C(19)-C(14)-Si(1) | 114.2(4)  |
| C(7)-C(6)-C(11)    | 119.6(4)   | C(20)-C(14)-Si(1) | 113.7(4)  |
| C(7)-C(6)-P(1)     | 120.3(3)   |                   |           |

Symmetry transformations used to generate equivalent atoms: #1  $-x, -y, -z$

**Table S3.** Bond Lengths [Å] and Angles [°] for *cis-4*

|                 |            |                    |          |
|-----------------|------------|--------------------|----------|
| S(1)-C(4)       | 1.719(3)   | C(12)-H(7)         | 1.0000   |
| S(1)-C(1)       | 1.731(3)   | C(13)-H(8)         | 0.9800   |
| C(1)-C(2)       | 1.377(4)   | C(13)-H(9)         | 0.9800   |
| C(1)-Si(1)      | 1.883(3)   | C(13)-H(10)        | 0.9800   |
| C(2)-C(3)       | 1.375(4)   | C(14)-H(11)        | 0.9800   |
| C(2)-H(1)       | 0.9500     | C(14)-H(12)        | 0.9800   |
| C(3)-C(4)       | 1.366(4)   | C(14)-H(13)        | 0.9800   |
| C(3)-P(1)       | 1.810(3)   | C(15)-C(16)        | 1.532(4) |
| C(4)-C(5)       | 1.458(4)   | C(15)-C(17)        | 1.534(4) |
| C(5)-C(5)#1     | 1.349(6)   | C(15)-H(14)        | 1.0000   |
| C(5)-P(1)#1     | 1.811(3)   | C(16)-H(15)        | 0.9800   |
| P(1)-C(6)       | 1.801(3)   | C(16)-H(16)        | 0.9800   |
| P(1)-C(5)#1     | 1.811(3)   | C(16)-H(17)        | 0.9800   |
| P(1)-S(2)       | 1.9480(11) | C(17)-H(18)        | 0.9800   |
| C(6)-C(7)       | 1.396(4)   | C(17)-H(19)        | 0.9800   |
| C(6)-C(11)      | 1.399(4)   | C(17)-H(20)        | 0.9800   |
| C(7)-C(8)       | 1.386(4)   | C(18)-C(19)        | 1.530(5) |
| C(7)-H(2)       | 0.9500     | C(18)-C(20)        | 1.535(4) |
| C(8)-C(9)       | 1.380(5)   | C(18)-H(21)        | 1.0000   |
| C(8)-H(3)       | 0.9500     | C(19)-H(22)        | 0.9800   |
| C(9)-C(10)      | 1.391(5)   | C(19)-H(23)        | 0.9800   |
| C(9)-H(4)       | 0.9500     | C(19)-H(24)        | 0.9800   |
| C(10)-C(11)     | 1.390(4)   | C(20)-H(25)        | 0.9800   |
| C(10)-H(5)      | 0.9500     | C(20)-H(26)        | 0.9800   |
| C(11)-H(6)      | 0.9500     | C(20)-H(27)        | 0.9800   |
| Si(1)-C(12)     | 1.888(3)   | C(21)-Cl(1)        | 1.750(4) |
| Si(1)-C(15)     | 1.888(3)   | C(21)-Cl(2)        | 1.756(4) |
| Si(1)-C(18)     | 1.891(3)   | C(21)-H(28)        | 0.9900   |
| C(12)-C(13)     | 1.530(5)   | C(21)-H(29)        | 0.9900   |
| C(12)-C(14)     | 1.537(5)   |                    |          |
| C(4)-S(1)-C(1)  | 92.40(14)  | C(4)-C(3)-P(1)     | 108.5(2) |
| C(2)-C(1)-S(1)  | 108.2(2)   | C(2)-C(3)-P(1)     | 139.7(2) |
| C(2)-C(1)-Si(1) | 132.2(2)   | C(3)-C(4)-C(5)     | 116.5(3) |
| S(1)-C(1)-Si(1) | 119.55(18) | C(3)-C(4)-S(1)     | 111.4(2) |
| C(3)-C(2)-C(1)  | 116.2(3)   | C(5)-C(4)-S(1)     | 132.0(2) |
| C(3)-C(2)-H(1)  | 121.9      | C(5)#1-C(5)-C(4)   | 112.3(3) |
| C(1)-C(2)-H(1)  | 121.9      | C(5)#1-C(5)-P(1)#1 | 111.6(3) |
| C(4)-C(3)-C(2)  | 111.8(3)   | C(4)-C(5)-P(1)#1   | 136.0(2) |

|                   |            |                   |          |
|-------------------|------------|-------------------|----------|
| C(6)-P(1)-C(3)    | 109.56(14) | H(8)-C(13)-H(10)  | 109.5    |
| C(6)-P(1)-C(5)#1  | 106.62(14) | H(9)-C(13)-H(10)  | 109.5    |
| C(3)-P(1)-C(5)#1  | 90.89(14)  | C(12)-C(14)-H(11) | 109.5    |
| C(6)-P(1)-S(2)    | 115.13(11) | C(12)-C(14)-H(12) | 109.5    |
| C(3)-P(1)-S(2)    | 119.14(10) | H(11)-C(14)-H(12) | 109.5    |
| C(5)#1-P(1)-S(2)  | 112.40(10) | C(12)-C(14)-H(13) | 109.5    |
| C(7)-C(6)-C(11)   | 120.1(3)   | H(11)-C(14)-H(13) | 109.5    |
| C(7)-C(6)-P(1)    | 121.8(2)   | H(12)-C(14)-H(13) | 109.5    |
| C(11)-C(6)-P(1)   | 118.1(2)   | C(16)-C(15)-C(17) | 110.3(3) |
| C(8)-C(7)-C(6)    | 119.3(3)   | C(16)-C(15)-Si(1) | 112.5(2) |
| C(8)-C(7)-H(2)    | 120.3      | C(17)-C(15)-Si(1) | 112.1(2) |
| C(6)-C(7)-H(2)    | 120.3      | C(16)-C(15)-H(14) | 107.2    |
| C(9)-C(8)-C(7)    | 120.7(3)   | C(17)-C(15)-H(14) | 107.2    |
| C(9)-C(8)-H(3)    | 119.7      | Si(1)-C(15)-H(14) | 107.2    |
| C(7)-C(8)-H(3)    | 119.7      | C(15)-C(16)-H(15) | 109.5    |
| C(8)-C(9)-C(10)   | 120.4(3)   | C(15)-C(16)-H(16) | 109.5    |
| C(8)-C(9)-H(4)    | 119.8      | H(15)-C(16)-H(16) | 109.5    |
| C(10)-C(9)-H(4)   | 119.8      | C(15)-C(16)-H(17) | 109.5    |
| C(11)-C(10)-C(9)  | 119.7(3)   | H(15)-C(16)-H(17) | 109.5    |
| C(11)-C(10)-H(5)  | 120.1      | H(16)-C(16)-H(17) | 109.5    |
| C(9)-C(10)-H(5)   | 120.1      | C(15)-C(17)-H(18) | 109.5    |
| C(10)-C(11)-C(6)  | 119.8(3)   | C(15)-C(17)-H(19) | 109.5    |
| C(10)-C(11)-H(6)  | 120.1      | H(18)-C(17)-H(19) | 109.5    |
| C(6)-C(11)-H(6)   | 120.1      | C(15)-C(17)-H(20) | 109.5    |
| C(1)-Si(1)-C(12)  | 107.15(14) | H(18)-C(17)-H(20) | 109.5    |
| C(1)-Si(1)-C(15)  | 107.75(13) | H(19)-C(17)-H(20) | 109.5    |
| C(12)-Si(1)-C(15) | 109.32(14) | C(19)-C(18)-C(20) | 110.6(3) |
| C(1)-Si(1)-C(18)  | 105.89(14) | C(19)-C(18)-Si(1) | 114.1(2) |
| C(12)-Si(1)-C(18) | 116.97(14) | C(20)-C(18)-Si(1) | 113.8(2) |
| C(15)-Si(1)-C(18) | 109.34(14) | C(19)-C(18)-H(21) | 105.8    |
| C(13)-C(12)-C(14) | 110.0(3)   | C(20)-C(18)-H(21) | 105.8    |
| C(13)-C(12)-Si(1) | 114.9(2)   | Si(1)-C(18)-H(21) | 105.8    |
| C(14)-C(12)-Si(1) | 112.5(2)   | C(18)-C(19)-H(22) | 109.5    |
| C(13)-C(12)-H(7)  | 106.3      | C(18)-C(19)-H(23) | 109.5    |
| C(14)-C(12)-H(7)  | 106.3      | H(22)-C(19)-H(23) | 109.5    |
| Si(1)-C(12)-H(7)  | 106.3      | C(18)-C(19)-H(24) | 109.5    |
| C(12)-C(13)-H(8)  | 109.5      | H(22)-C(19)-H(24) | 109.5    |
| C(12)-C(13)-H(9)  | 109.5      | H(23)-C(19)-H(24) | 109.5    |
| H(8)-C(13)-H(9)   | 109.5      | C(18)-C(20)-H(25) | 109.5    |
| C(12)-C(13)-H(10) | 109.5      | C(18)-C(20)-H(26) | 109.5    |



|                   |          |                   |       |
|-------------------|----------|-------------------|-------|
| H(25)-C(20)-H(26) | 109.5    | Cl(1)-C(21)-H(28) | 109.3 |
| C(18)-C(20)-H(27) | 109.5    | Cl(2)-C(21)-H(28) | 109.3 |
| H(25)-C(20)-H(27) | 109.5    | Cl(1)-C(21)-H(29) | 109.3 |
| H(26)-C(20)-H(27) | 109.5    | Cl(2)-C(21)-H(29) | 109.3 |
| Cl(1)-C(21)-Cl(2) | 111.8(2) | H(28)-C(21)-H(29) | 107.9 |

---

Symmetry transformations used to generate equivalent atoms: #1  $-x+2, y, -z+3/2$

#### 4. Theoretical Calculations

**Table S4.** The Cartesian Coordinates (Å) of the Optimized Structure for *trans-2'*

| atom | x               | y               | z               |
|------|-----------------|-----------------|-----------------|
| C    | -0.485724048706 | -0.303519329425 | -0.388070847731 |
| C    | 0.485724048706  | 0.303519329425  | 0.388070847731  |
| C    | 0.819418631782  | 0.700691420053  | -2.125417555251 |
| C    | -0.283882924652 | -0.081643773567 | -1.795694086664 |
| C    | 0.952205666193  | 0.895449105412  | -3.525796682672 |
| H    | 1.746676279357  | 1.480115369590  | -3.978669584982 |
| C    | -0.017836509818 | 0.261961335501  | -4.279881203409 |
| S    | -1.148630978400 | -0.579240977051 | -3.216489160642 |
| C    | -0.819418631782 | -0.700691420053 | 2.125417555251  |
| C    | 0.283882924652  | 0.081643773567  | 1.795694086664  |
| C    | -0.952205666193 | -0.895449105412 | 3.525796682672  |
| H    | -1.746676279357 | -1.480115369590 | 3.978669584982  |
| C    | 0.017836509818  | -0.261961335501 | 4.279881203409  |
| S    | 1.148630978400  | 0.579240977051  | 3.216489160642  |
| P    | 1.616541674452  | 1.351906426224  | -0.610846265825 |
| P    | -1.616541674452 | -1.351906426224 | 0.610846265825  |
| Si   | 0.202135625306  | -0.241923792972 | 6.153792649866  |
| Si   | -0.202135625306 | 0.241923792972  | -6.153792649866 |
| C    | 1.871702168604  | -0.992169529125 | 6.636241807207  |
| H    | 2.006414028160  | -0.986184526430 | 7.725123877847  |
| H    | 2.706398943309  | -0.433607156279 | 6.196300861557  |
| H    | 1.952691442327  | -2.030234754452 | 6.293856466776  |
| C    | -0.103633709079 | -1.538808365087 | -6.787823211506 |
| H    | 0.860151184375  | -1.996147174387 | -6.536066890236 |
| H    | -0.217704713713 | -1.574236856855 | -7.878437790317 |
| H    | -0.890695745229 | -2.165510354513 | -6.351882146315 |
| C    | 1.206727705554  | 1.270188194390  | -6.886227561620 |
| H    | 2.189129359062  | 0.859863156517  | -6.625468752239 |
| H    | 1.172996849432  | 2.309918897508  | -6.540740304492 |
| H    | 1.136428133933  | 1.284925254834  | -7.980763079962 |
| C    | -1.206727705554 | -1.270188194390 | 6.886227561620  |
| H    | -1.136428133933 | -1.284925254834 | 7.980763079962  |
| H    | -1.172996849432 | -2.309918897508 | 6.540740304492  |
| H    | -2.189129359062 | -0.859863156517 | 6.625468752239  |
| C    | 0.103633709079  | 1.538808365087  | 6.787823211506  |
| H    | 0.217704713713  | 1.574236856855  | 7.878437790317  |
| H    | -0.860151184375 | 1.996147174387  | 6.536066890236  |
| H    | 0.890695745229  | 2.165510354513  | 6.351882146315  |

(continued)

| atom | x               | y               | z               |
|------|-----------------|-----------------|-----------------|
| C    | -1.871702168604 | 0.992169529125  | -6.636241807207 |
| H    | -1.952691442327 | 2.030234754452  | -6.293856466776 |
| H    | -2.706398943309 | 0.433607156279  | -6.196300861557 |
| H    | -2.006414028160 | 0.986184526430  | -7.725123877847 |
| C    | 3.246283576781  | 0.476868467071  | -0.517339547042 |
| C    | 5.769573375721  | -0.734935685524 | -0.339813040321 |
| C    | 4.367708731185  | 1.222986240775  | -0.130899869895 |
| C    | 3.401848903772  | -0.886190272211 | -0.816000334039 |
| C    | 4.655761884430  | -1.486813421879 | -0.727531048245 |
| C    | 5.624947564851  | 0.619130521764  | -0.041254880764 |
| H    | 4.257032262884  | 2.279593013697  | 0.099488155845  |
| H    | 2.538932402416  | -1.472643081998 | -1.118574016717 |
| H    | 4.766310021583  | -2.542805925641 | -0.960118218441 |
| H    | 6.487298687887  | 1.208037862338  | 0.259846340716  |
| H    | 6.746517449867  | -1.206388312385 | -0.272095801345 |
| C    | -3.246283576781 | -0.476868467071 | 0.517339547042  |
| C    | -5.769573375721 | 0.734935685524  | 0.339813040321  |
| C    | -4.367708731185 | -1.222986240775 | 0.130899869895  |
| C    | -3.401848903772 | 0.886190272211  | 0.816000334039  |
| C    | -4.655761884430 | 1.486813421879  | 0.727531048245  |
| C    | -5.624947564851 | -0.619130521764 | 0.041254880764  |
| H    | -4.257032262884 | -2.279593013697 | -0.099488155845 |
| H    | -2.538932402416 | 1.472643081998  | 1.118574016717  |
| H    | -4.766310021583 | 2.542805925641  | 0.960118218441  |
| H    | -6.487298687887 | -1.208037862338 | -0.259846340716 |
| H    | -6.746517449867 | 1.206388312385  | 0.272095801345  |

**Table S5.** The Cartesian Coordinates (Å) of the Optimized Structure for *trans*-**3'**

| atom | x               | y               | z               |
|------|-----------------|-----------------|-----------------|
| C    | -0.473581797886 | -0.310512388892 | -0.382662409316 |
| C    | 0.473581797886  | 0.310512388892  | 0.382662409316  |
| C    | 0.822709950322  | 0.622526917543  | -2.181747244799 |
| C    | -0.276709067071 | -0.136989009000 | -1.809907136953 |
| C    | 0.948137910330  | 0.760947395508  | -3.585200176425 |
| H    | 1.740889406816  | 1.323224300925  | -4.067207946939 |
| C    | -0.047207052191 | 0.115781399483  | -4.300959548728 |
| S    | -1.156267884034 | -0.683902202707 | -3.193056470361 |
| C    | -0.822709950322 | -0.622526917543 | 2.181747244799  |
| C    | 0.276709067071  | 0.136989009000  | 1.809907136953  |

(continued)

| atom | x               | y               | z               |
|------|-----------------|-----------------|-----------------|
| C    | -0.948137910330 | -0.760947395508 | 3.585200176425  |
| H    | -1.740889406816 | -1.323224300925 | 4.067207946939  |
| C    | 0.047207052191  | -0.115781399483 | 4.300959548728  |
| S    | 1.156267884034  | 0.683902202707  | 3.193056470361  |
| P    | 1.708671100766  | 1.176227229125  | -0.684472385161 |
| P    | -1.708671100766 | -1.176227229125 | 0.684472385161  |
| Si   | 0.274954479254  | -0.050971313424 | 6.174901093266  |
| Si   | -0.274954479254 | 0.050971313424  | -6.174901093266 |
| C    | 1.935833678106  | -0.831857580308 | 6.632599230062  |
| H    | 2.094821305391  | -0.806861917824 | 7.717855598024  |
| H    | 2.773567996499  | -0.302299691000 | 6.163605469304  |
| H    | 1.984028964550  | -1.878460632221 | 6.310840576609  |
| C    | -0.233462757281 | -1.750678871860 | -6.749293789557 |
| H    | 0.723547454347  | -2.224168284371 | -6.501936341273 |
| H    | -0.370098587691 | -1.817806667580 | -7.835717432399 |
| H    | -1.027110949022 | -2.343531939342 | -6.279288784713 |
| C    | 1.145590349106  | 1.024038171163  | -6.954785176411 |
| H    | 2.121353013024  | 0.590227046740  | -6.707553744352 |
| H    | 1.149012553700  | 2.070726408873  | -6.629447821106 |
| H    | 1.051674822262  | 1.020142074259  | -8.047551540218 |
| C    | -1.145590349106 | -1.024038171163 | 6.954785176411  |
| H    | -1.051674822262 | -1.020142074259 | 8.047551540218  |
| H    | -1.149012553700 | -2.070726408873 | 6.629447821106  |
| H    | -2.121353013024 | -0.590227046740 | 6.707553744352  |
| C    | 0.233462757281  | 1.750678871860  | 6.749293789557  |
| H    | 0.370098587691  | 1.817806667580  | 7.835717432399  |
| H    | -0.723547454347 | 2.224168284371  | 6.501936341273  |
| H    | 1.027110949022  | 2.343531939342  | 6.279288784713  |
| C    | -1.935833678106 | 0.831857580308  | -6.632599230062 |
| H    | -1.984028964550 | 1.878460632221  | -6.310840576609 |
| H    | -2.773567996499 | 0.302299691000  | -6.163605469304 |
| H    | -2.094821305391 | 0.806861917824  | -7.717855598024 |
| C    | 3.250779733060  | 0.208785047067  | -0.559139168924 |
| C    | 5.672633136921  | -1.164457413853 | -0.328717808040 |
| C    | 4.421514344917  | 0.902854144077  | -0.228696286165 |
| C    | 3.295830186022  | -1.176798914076 | -0.774583047981 |
| C    | 4.504934980770  | -1.859458985473 | -0.657740628849 |
| C    | 5.630745490728  | 0.213838132907  | -0.115533141210 |
| H    | 4.372781802119  | 1.975621628670  | -0.066873984796 |

(continued)

| atom | x               | y               | z               |
|------|-----------------|-----------------|-----------------|
| H    | 2.391447470203  | -1.721653043759 | -1.032712575041 |
| H    | 4.537098706352  | -2.932816806225 | -0.823283778202 |
| H    | 6.538178924790  | 0.754598148706  | 0.139199578744  |
| H    | 6.614161850387  | -1.699859673284 | -0.239155030095 |
| C    | -3.250779733060 | -0.208785047067 | 0.559139168924  |
| C    | -5.672633136921 | 1.164457413853  | 0.328717808040  |
| C    | -4.421514344917 | -0.902854144077 | 0.228696286165  |
| C    | -3.295830186022 | 1.176798914076  | 0.774583047981  |
| C    | -4.504934980770 | 1.859458985473  | 0.657740628849  |
| C    | -5.630745490728 | -0.213838132907 | 0.115533141210  |
| H    | -4.372781802119 | -1.975621628670 | 0.066873984796  |
| H    | -2.391447470203 | 1.721653043759  | 1.032712575041  |
| H    | -4.537098706352 | 2.932816806225  | 0.823283778202  |
| H    | -6.538178924790 | -0.754598148706 | -0.139199578744 |
| H    | -6.614161850387 | 1.699859673284  | 0.239155030095  |
| O    | 1.913232182258  | 2.643933061122  | -0.453129267803 |
| O    | -1.913232182258 | -2.643933061122 | 0.453129267803  |

**Table S6.** The Cartesian Coordinates (Å) of the Optimized Structure for *trans-4'*

| atom | x               | y               | z               |
|------|-----------------|-----------------|-----------------|
| C    | -0.498666698856 | -0.277760954618 | -0.377364208372 |
| C    | 0.498666698856  | 0.277760954618  | 0.377364208372  |
| C    | 0.845233974914  | 0.535077268844  | -2.188810968630 |
| C    | -0.304431933763 | -0.140540781781 | -1.804927087920 |
| C    | 0.971604956754  | 0.667767302465  | -3.592203916105 |
| H    | 1.798045042740  | 1.174939232821  | -4.078293086830 |
| C    | -0.072844755310 | 0.094187052121  | -4.297339885492 |
| S    | -1.231044783312 | -0.622095837287 | -3.181934146544 |
| C    | -0.845233974914 | -0.535077268844 | 2.188810968630  |
| C    | 0.304431933763  | 0.140540781781  | 1.804927087920  |
| C    | -0.971604956754 | -0.667767302465 | 3.592203916105  |
| H    | -1.798045042740 | -1.174939232821 | 4.078293086830  |
| C    | 0.072844755310  | -0.094187052121 | 4.297339885492  |
| S    | 1.231044783312  | 0.622095837287  | 3.181934146544  |
| P    | 1.775259101795  | 1.053053982335  | -0.704844944959 |
| P    | -1.775259101795 | -1.053053982335 | 0.704844944959  |
| Si   | 0.311319771827  | -0.034633149875 | 6.171022242419  |
| Si   | -0.311319771827 | 0.034633149875  | -6.171022242419 |

(continued)

| atom | x               | y               | z               |
|------|-----------------|-----------------|-----------------|
| C    | 1.975000886666  | -0.818544517075 | 6.611559510525  |
| H    | 2.142131382518  | -0.798222326988 | 7.695643547596  |
| H    | 2.809941853492  | -0.287481304350 | 6.139192353352  |
| H    | 2.019990841521  | -1.863771406553 | 6.284998760631  |
| C    | -0.274003580392 | -1.764699694585 | -6.752638516546 |
| H    | 0.684012538532  | -2.239548144776 | -6.511852025154 |
| H    | -0.415797318800 | -1.827098645827 | -7.838704478112 |
| H    | -1.065617208350 | -2.358649522116 | -6.280768959844 |
| C    | 1.106153172504  | 1.008881368464  | -6.954473677192 |
| H    | 2.082597229035  | 0.570450733825  | -6.718079838828 |
| H    | 1.115099584263  | 2.052993384129  | -6.621283669581 |
| H    | 1.004392418729  | 1.012490916879  | -8.046529345244 |
| C    | -1.106153172504 | -1.008881368464 | 6.954473677192  |
| H    | -1.004392418729 | -1.012490916879 | 8.046529345244  |
| H    | -1.115099584263 | -2.052993384129 | 6.621283669581  |
| H    | -2.082597229035 | -0.570450733825 | 6.718079838828  |
| C    | 0.274003580392  | 1.764699694585  | 6.752638516546  |
| H    | 0.415797318800  | 1.827098645827  | 7.838704478112  |
| H    | -0.684012538532 | 2.239548144776  | 6.511852025154  |
| H    | 1.065617208350  | 2.358649522116  | 6.280768959844  |
| C    | -1.975000886666 | 0.818544517075  | -6.611559510525 |
| H    | -2.019990841521 | 1.863771406553  | -6.284998760631 |
| H    | -2.809941853492 | 0.287481304350  | -6.139192353352 |
| H    | -2.142131382518 | 0.798222326988  | -7.695643547596 |
| C    | 3.254544009152  | -0.028339663272 | -0.580027346780 |
| C    | 5.516135630667  | -1.654927501850 | -0.384609726766 |
| C    | 4.507523186326  | 0.543420704749  | -0.337897573890 |
| C    | 3.133371387783  | -1.419473407675 | -0.724542501253 |
| C    | 4.263778064118  | -2.227702813712 | -0.624887341108 |
| C    | 5.636697280836  | -0.272441427988 | -0.242168847115 |
| H    | 4.588744976076  | 1.620804340783  | -0.226069326865 |
| H    | 2.163297790864  | -1.871486124404 | -0.911960185126 |
| H    | 4.166715068557  | -3.304262527648 | -0.733847061664 |
| H    | 6.608847000034  | 0.175171800124  | -0.054920395161 |
| H    | 6.395817457275  | -2.288357716477 | -0.307871456991 |
| C    | -3.254544009152 | 0.028339663272  | 0.580027346780  |
| C    | -5.516135630667 | 1.654927501850  | 0.384609726766  |
| C    | -4.507523186326 | -0.543420704749 | 0.337897573890  |
| C    | -3.133371387783 | 1.419473407675  | 0.724542501253  |

(continued)

| atom | <i>x</i>        | <i>y</i>        | <i>z</i>        |
|------|-----------------|-----------------|-----------------|
| C    | -4.263778064118 | 2.227702813712  | 0.624887341108  |
| C    | -5.636697280836 | 0.272441427988  | 0.242168847115  |
| H    | -4.588744976076 | -1.620804340783 | 0.226069326865  |
| H    | -2.163297790864 | 1.871486124404  | 0.911960185126  |
| H    | -4.166715068557 | 3.304262527648  | 0.733847061664  |
| H    | -6.608847000034 | -0.175171800124 | 0.054920395161  |
| H    | -6.395817457275 | 2.288357716477  | 0.307871456991  |
| S    | 2.101093646021  | 2.975857680875  | -0.431361257765 |
| S    | -2.101093646021 | -2.975857680875 | 0.431361257765  |
